1 **Growth under high light and elevated temperature affects metabolic responses and**  
2 **accumulation of health-promoting metabolites in kale varieties**

3

4 *Sara Alegre<sup>1</sup>, Jesús Pascual<sup>1</sup>, Andrea Trotta<sup>1</sup>, Peter J. Gollan<sup>1</sup>, Wei Yang<sup>2</sup>, Baoru Yang<sup>2</sup>, Eva-*  
5 *Mari Aro<sup>1</sup>, Meike Burow<sup>3</sup> and Saijaliisa Kangasjärvi<sup>1</sup>*

6

7 <sup>1</sup>Molecular Plant Biology, Department of Biochemistry, University of Turku, FI-20014, Turku,  
8 Finland.

9 <sup>2</sup>Food Chemistry and Food Development, Department of Biochemistry, University of Turku,  
10 FI-20014 Turku, Finland

11 <sup>3</sup>DynaMo Center, Department of Plant and Environmental Sciences, Faculty of Science,  
12 University of Copenhagen, Thorvaldsensvej 40, 1871 Frederiksberg C, Denmark

13

14 E-mail addresses of the co-authors: [saalga@utu.fi](mailto:saalga@utu.fi), [jepavaz@utu.fi](mailto:jepavaz@utu.fi), [andrea.trotta@utu.fi](mailto:andrea.trotta@utu.fi),  
15 [peter.gollan@utu.fi](mailto:peter.gollan@utu.fi), [yanwei@utu.fi](mailto:yanwei@utu.fi), [bayang@utu.fi](mailto:bayang@utu.fi), [evaaro@utu.fi](mailto:evaaro@utu.fi), [mbu@plen.ku.dk](mailto:mbu@plen.ku.dk),

16 Corresponding author: [saijaliisa.kangasjarvi@utu.fi](mailto:saijaliisa.kangasjarvi@utu.fi) Tel. +358 50 439 1365

17

18

19 **Abstract**

20 Plants are highly sensitive to changes in the light environment and respond to alternating light  
21 conditions by coordinated adjustments in foliar gene expression and metabolism. Here we  
22 assessed how long-term growth under high irradiance and elevated temperature, a scenario  
23 increasingly associated with the climate change, affects foliar chemical composition of  
24 Brassicaceous plants. Transcript profiling of *Arabidopsis* suggested up-regulation of  
25 phenylpropanoid metabolism and down-regulation of processes related to biotic stress  
26 resistance and indole glucosinolates (GSL). These observations prompted metabolite profiling  
27 of purple (Black Magic) and pale green (Half Tall) varieties of kale, an economically important  
28 crop species. Long-term acclimation to high light and elevated temperature resulted in reduced  
29 levels of 4-methoxy-indol-3-yl-methyl GSL in both kale varieties. The total levels of aliphatic  
30 GSLs increased under these conditions, although the profiles of individual GSL structures  
31 showed cultivar-dependent differences. Black Magic became rich in 4-methylsulfinylbutyl  
32 GSL and 2-phenylethyl GSL, which have health-promoting effects in human diet. Additionally,  
33 the purple pigmentation of Black Magic became intensified due to increased accumulation  
34 anthocyanins, especially derivatives of cyanidin. These findings demonstrate that the  
35 potentially stressful combination of high light and elevated temperature can have beneficial  
36 effects on the accumulation of health-promoting metabolites in leafy vegetables.

37

38 **Key words**

39 *Arabidopsis*, Brassica, high light acclimation, transcriptome, metabolite profiling,  
40 glucosinolate, anthocyanins

41

42

43

#### 44 **Acknowledgements**

45 This work was supported by Academy of Finland project 307719 to S.K., 325122 to JP, 303757  
46 to E-M.A. and the Academy of Finland Center of Excellence in Primary Producers 2014-2019  
47 (307335). BY and WY acknowledge the funding for Competitive funding to strengthen  
48 universities' research profiles (Profi 4, Decision No. 318894, Subproject: FOOD  
49 INNOVATIONS) by the Academy of Finland. S.A. was funded by the University of Turku  
50 Doctoral Programme in Molecular Life Sciences. MB was funded by the Danish National  
51 Research Foundation, DNRF (grant 99). The authors declare no conflict of interest.

## 52 **Introduction**

53 Light is an important external factor that drives photosynthesis, metabolism and growth in  
54 plants. To cope with varying light conditions, plants undergo coordinated acclimation  
55 responses, which can occur across molecular, cellular and whole plant levels and range from  
56 fast photosynthetic rearrangements to durable adjustments in metabolite composition,  
57 morphology, flowering time and seed production (Aro *et al.*, 1993; Foyer, 2018; Pascual *et al.*,  
58 2017). Studies on model plants, notably *Arabidopsis thaliana* (hereafter Arabidopsis), have  
59 elucidated the dynamic nature of gene expression occurring upon short-term fluctuations in  
60 light conditions (Spetea, Rintamäki & Schoefs 2014; Gollan, Tikkanen & Aro 2015; Crisp *et*  
61 *al.* 2017). In nature, high light is commonly accompanied by elevated temperature, and  
62 episodes of bright and hot conditions may become more frequent due to climate change. A  
63 typical response to the potentially stressful combination of light and heat is accumulation of  
64 carotenoids and phenolic pigments, which can protect foliar tissues against light-induced  
65 damage (Chalker-Scott 1999; Zeng, Chow, Su, Peng & Peng 2010). Long-term metabolic  
66 responses to high light and elevated temperature, beyond regulation of photosynthesis and  
67 chloroplast metabolism, have remained less well understood.

68

69 Sulphur metabolism is tightly linked with light-driven redox chemistry in chloroplasts and  
70 yields a number of precursors, metabolic intermediates and specialised compounds, which are  
71 vital in mediating defensive responses upon environmental challenges (reviewed by Chan *et*  
72 *al.*, 2019). In cruciferous plants, sulphur metabolism sustains the biosynthesis of glucosinolates  
73 (GSLs), which are sulfur- and nitrogen-containing specialised metabolites whose breakdown  
74 products cause the characteristic pungent taste of Brassica crops (Bell, Oloyede, Lignou,  
75 Wagstaff & Methven 2018). Studies on Arabidopsis, kale (*Brassica oleracea* convar  
76 *acephala*), broccoli (*B. oleracea* var. *italica*) and cabbage (*B. oleracea* var. *capitata*) have

77 elucidated the commercial and ecological impacts of GSLs in human and animal nutrition as  
78 well as in plant-environment interactions, such as those with pathogens and herbivores  
79 (Wittstock & Burow 2010; Sharma, Singh & Mikawlawng 2014; Traka 2016; Francisco *et al.*  
80 2017). In the human diet, consumption of GSL-rich cruciferous crops has been associated with  
81 a reduced risk of cancer (Gupta, Wright, Kim & Srivastava 2015; Megna, Carney, Nukaya,  
82 Geiger & Kennedy 2016; Katz, Nisani & Chamovitz 2018) and chronic inflammation diseases  
83 (Sun *et al.* 2015; Yamagishi & Matsui 2016), but certain GSL species might also have  
84 detrimental effects in animal nutrition (Felker, Bunch & Leung 2016). Kale breeding has  
85 yielded a multitude of varieties that differ with respect to shape, coloration and the content of  
86 specialized metabolites, which can increase the nutritional and market value of the leafy  
87 vegetables (Bell *et al.* 2018).

88

89 Studies on *Arabidopsis* have elucidated the biosynthesis, modification, degradation and  
90 transport of certain GSLs (Halkier & Gershenzon 2006; Søndery, Geu-Flores & Halkier 2010;  
91 Jensen, Halkier & Burow 2014) and uncovered mechanisms behind transcriptional and post-  
92 translational regulation of these processes (Celenza *et al.* 2005; Gigolashvili *et al.* 2007;  
93 Frerigmann *et al.* 2016; Rahikainen *et al.* 2017). The GSL core structure consists of a glucose  
94 moiety bound to a sulfonated aldoxime and a variable amino acid-derived side chain. The  
95 structural diversity of GSLs species stems from modifications that may take place in both the  
96 side group and the core structure (Søndery *et al.* 2010; Jeschke & Burow 2018). Recently,  
97 formation of a methoxylated tryptophan-derived indole GSL, 4-methoxy-indol-3-yl-methyl  
98 GSL (4MO-I3M GSL), was functionally connected with *S*-Adenosyl-L-Homocysteine  
99 Hydrolase (SAHH), which is the key enzyme of the activated methyl cycle, essential for all  
100 trans-methylation reactions in all living cells (Rahikainen, Alegre, Trotta, Pascual &  
101 Kangasjärvi 2018). In *Arabidopsis*, accumulation of SAHH in distinct oligomeric complexes

102 correlated with increased abundance of 4MO-I3M, but the potential role of SAHH in defence  
103 and its link to growth light conditions remain obscure (Rahikainen *et al.* 2017).

104

105 Here we explored how growth under high light and elevated temperature affects metabolic  
106 adjustments in kale, an economically relevant brassicaceous crop species. Analysis of  
107 transcriptomic datasets available for Arabidopsis suggested up-regulation of processes related  
108 to phenolic compounds, while processes related to biotic stress resistance and indole GSL  
109 became down-regulated. These observations prompted analysis of amino acids, anthocyanins  
110 and GSL contents in kales, which revealed both stress-induced and cultivar-dependent  
111 adjustments in purple (Black Magic, BM) and pale green (Half Tall, HT) varieties of this leafy  
112 vegetable. Both kale varieties responded to long-term growth under high light and elevated  
113 temperature by reducing the contents of methionine, the methyl donor *S*-adenosyl methionine  
114 (SAM) and the methoxylated indole GSL 4MO-I3M. In contrast, the total contents of  
115 methionine-derived aliphatic GSLs increased in the high-light-grown kales, with distinct  
116 cultivar-dependent GSL-profiles. When grown under the warm high light conditions, Black  
117 Magic became particularly rich in specific anthocyanins and health-promoting aliphatic GSLs.  
118 Collectively, translation of the basic knowledge from Arabidopsis to kales highlighted the  
119 effect of growth light on the foliar chemical composition and nutritional properties of leafy  
120 vegetables.

121

122

123

124

## 125 **Material and Methods**

### 126 **Plant material**

127 *Arabidopsis thaliana* (L.) Heynh. ecotype Columbia-0 was grown in 50% relative humidity  
128 and 8/16-hour photoperiod under growth light (GL; 130  $\mu\text{mol photons m}^{-2} \text{sec}^{-1}$  and 22°C) for  
129 2 weeks and thereafter shifted for acclimation under high light (HL; 800  $\mu\text{mol photons m}^{-2} \text{sec}^{-1}$   
130 and 28°C) for 2 weeks. Control plants were grown under GL conditions for 4 weeks. *Brassica*  
131 *oleracea* convar. *acephala*, Half Tall and Black Magic, were grown in 50% relative humidity  
132 and 12/12-hour photoperiod. Plants were grown under growth light (130  $\mu\text{mol photons m}^{-2} \text{sec}^{-1}$   
133 and 22°C) or in high light (800  $\mu\text{mol photons m}^{-2} \text{sec}^{-1}$  and 26°C). Plants were germinated in  
134 GL and transferred to one of the above-mentioned conditions two days after germination.  
135 Experiments with kales were carried out with 19 days old plants. For each kale variety and  
136 condition leaves of 16 plants were collected. Each biological replicate consisted of the  
137 longitudinal halves of leaves from two plants, resulting in eight biological replicates.

138

### 139 **Analysis of gene expression**

140 Rosettes of *Arabidopsis* grown under GL or acclimated for two weeks in HL were collected  
141 four hours after the onset of light period and analysed by Agilent *Arabidopsis* (V4) Gene  
142 Expression Microarrays, 4x44K (Design ID 021169) as described by Konert *et al.*, 2015.

143

### 144 **Comparison of gene expression profiles**

145 Genes with absolute expression fold change (FC) >2 and p-values <0.05 in the long-term  
146 *Arabidopsis* HL dataset presented in Supplementary Table S1 were compared with publicly-  
147 available datasets obtained from short-term shifts to HL. The short-term HL treatments  
148 included in the analysis are listed in Supplementary Table S2. They were selected by  
149 comparing the 400 most significantly differentially expressed genes in the long-term HL

150 dataset (Supplementary Table S1) with the Affymetrix Arabidopsis ATH1 Genome Array  
151 database, querying against experiments containing the keyword “high light” in the  
152 Genevestigator (RRID:SCR\_002358) database (Hruz *et al.* 2008).

153

154 The RAW data of the selected short-term HL experiments (summarized in supplementary  
155 Table S2) were downloaded from Gene Expression Omnibus (RRID:SCR\_005012;  
156 <https://www.ncbi.nlm.nih.gov/geo/>) and ArrayExpress (RRID:SCR\_002964;  
157 <https://www.ebi.ac.uk/arrayexpress/>) and pre-processed independently in Bioconductor  
158 (RRID:SCR\_006442; <http://www.bioconductor.org/>), comprising normalization by Robust  
159 Multi-array Average. Differential gene expression was analyzed by *limma* package (v3.36.5;  
160 RRID:SCR\_010943) (Smyth 2004) using the Benjamini-Hochberg false discovery rate for  
161 adjusting p-values for multiple hypothesis testing. Absolute FC>2 and p-values <0.05 were  
162 considered differential. The transcript profiles were hierarchically clustered with R package  
163 *pheatmap* (v1.0.12) (Kolde 2019) using Ward’s method and Euclidean distance.

164 Venn diagram was generated with VennDiagram R package (v1.6.20; RRID:SCR\_002414)  
165 (Chen & Boutros 2011). All analyses were performed in R (v3.5.1) (RCore Team, 2018) run  
166 in RStudio (v1.1.456; RRID:SCR\_000432) (RStudio Team, 2018). Gene Ontology enrichment  
167 analysis were performed and GO trees were generated with ShinyGO v0.60 (Ge & Jung 2018).

168

### 169 **Photosynthesis measurements**

170 Photosynthetic activity was estimated by analysis of chlorophyll *a* fluorescence and P700  
171 oxidation using a DUAL-PAM 100 measuring system (Waltz, Germany). The apparent  
172 electron transport rates of PSII and PSI were derived from the calculated quantum yields,  
173 according to the formula  $ETR = yield \times PAR \times 0.84 \times 0.5$ , where 0.84 is the average radiation



174 absorbed by the leaf and 0.5 is the fraction of photons distributed to each photosystem. Non-  
175 photochemical quenching (NPQ) was calculated by  $NPQ = (F_m - F_m')/F_m'$ . ETR(I), ETR(II)  
176 and NPQ were assessed increasing light intensities of 50, 125, 500 and 1000  $\mu\text{mol photons m}^{-2}$   
177  $\text{s}^{-1}$  in leaves after 30 min in darkness.

178

### 179 **Spectrophotometric measurement of total leaf pigments**

180 Spectrophotometric quantification of kale leaf pigments was performed as in Sims and Gamon,  
181 2002. Carotenoids were extracted from 100 mg of frozen leaf powder with 400  $\mu\text{l}$  acetone/tris  
182 buffer solution (80:20 v/v, pH 7.8). Anthocyanin contents were analyzed using 100 mg of  
183 powder extracted in acidified methanol (0.1% HCl, v/v).

184

### 185 **Mass spectrometric analysis of anthocyanins**

186 Anthocyanins were extracted from 500 mg of frozen leaf powder in a total volume of 45 ml of  
187 acidified methanol (0.1% HCl, v/v). After centrifugation, the supernatant was collected, the  
188 organic solvent was removed using a vacuum rotary evaporator at 40°C. The samples were  
189 dissolved in 1 ml of acidified methanol (1% HCl, v/v). Qualitative analysis of anthocyanins  
190 was performed using a Waters Acquity ultrahigh-performance liquid chromatography (UPLC)  
191 system (Waters Corp., Milford, MA, USA) combined with Waters Quattro Premier Tandem  
192 Quadrupole mass spectrometer (Waters Corp., Milford, MA, USA) equipped with an  
193 electrospray ionization (ESI) source. A Phenomenex Aeris peptide XB-C18 (3.6  $\mu\text{m}$ , 150  $\times$   
194 4.60 mm) column combined with a Phenomenex Security Guard Cartridge Kit (Torrance, CA,  
195 USA) was used and maintained at 35°C during the analysis. The analyses were carried out by  
196 a gradient elution with formic acid/water (5:95, v/v) as solvent A and acetonitrile as solvent B  
197 at a flow rate of 1 mL/min. The gradient program of solvent B in A (v/v) was 0–1 min with 4–  
198 6% B, 1–2 min with 6–8% B, 2–6 min with 8–9% B, 6–10 min with 9–10% B, 10–15 min with

199 10–20% B, 15–20 min with 20–25% B, 20–25 min with 25–80% B, 25–30 min with 80–4%  
200 B, and 30–35 min with 4% B. The injection volume was 10  $\mu$ L. A split joint was applied and  
201 directed a flow of 0.4 mL/min into the mass spectrometer after the UV detector. The ESI-  
202 tandem mass spectrometry (MS/MS) was operated according to the previous method by Yang  
203 *et al.*, 2018.

204

205 Quantitative analysis of anthocyanins was carried out using a Shimadzu Nexera UHPLC  
206 system (Shimadzu Corporation, Kyoto, Japan), which consisted of a CBM-20A central unit, a  
207 SIL-30AC auto sampler, two LC-30AD pumps, a CTO-20AC column oven, and a SPD-M20A  
208 diode array detector. The chromatographic conditions were the same as described above in  
209 qualitative analysis. An external standard of cyanidin 3-*O*-glucoside was used for quantitative  
210 analysis, and all the anthocyanins were quantified as equivalents of cyanidin 3-*O*-glucoside  
211 using the calibration curve constructed with this reference compound. The total content of  
212 anthocyanins was calculated as the sum of the peaks, which represented a minimum of 1% of  
213 the total peak area in the chromatogram.

214

### 215 **Glucosinolate analysis**

216 Frozen fresh material was homogenized in a bead mill (two 3 mm chrome balls, 2 x 30 s at 30  
217 Hz) and ~150 mg subsequently extracted with 1 mL ice-cold 85% (v/v) methanol containing  
218 20 nmol p-hydroxybenzyl glucosinolate (pOHb; PhytoLab, cat. No. 89793) as internal  
219 standard. After centrifugation (10 min, 13.000 x *g*, 4°C), GSLs were extracted from 150  $\mu$ L of  
220 the supernatant as desulfo-GSLs as described before (see Alternate Protocol 2, Crocoll *et al.*,  
221 2016). LC-MS/MS analysis was carried out on an Advance UHPLC system (Bruker, Bremen,  
222 Germany) equipped with C18 column (Kinetex 1.7  $\mu$  XB-C18, 10 cm x 2.1 mm, 1.7  $\mu$ m particle  
223 size, Phenomenex, Torrance, CA, USA) coupled to an EVOQ Elite TripleQuad mass

224 spectrometer (Bruker, Bremen, Germany) equipped with an electrospray ionisation source  
225 (ESI). The injection volume was 1  $\mu$ L. Separation was achieved with a gradient of water/0.05%  
226 (v/v) formic acid (solvent A) - acetonitrile (solvent B) at a flow rate of 0.4 mL/min at 40°C  
227 (formic acid, Sigma-Aldrich, cat. no. F0507; acetonitrile). The elution profile was 0-0.5 min  
228 with 2% B; 0.5-1.2 min with 2-30% B; 1.2-2.0 min with 30-100% B; 2.0-2.5 min with 100%  
229 B; 2.5-2.6 min with 100-2% B; 2.6-4.0 min with 2% B. The ion spray voltage was maintained  
230 at +3500 V. Cone temperature was set to 300°C and cone gas to 20 psi. Heated probe  
231 temperature was set to 400°C and probe gas flow set to 40 psi. Nebulising gas was set to 60 psi  
232 and collision gas to 1.6 mTorr. Desulfo-GLSs were monitored based by Multiple Reaction  
233 Monitoring (MRM) with appropriate analyte parent ion to product ion transitions as previously  
234 described (Crocoll *et al.* 2016). Quantification of the individual GLSs was based on response  
235 factors relative to the internal standard pOHB calculated from standard curves in control  
236 extracts.

237

### 238 **Amino acid analysis**

239 A 20- $\mu$ l aliquot of the supernatant collected as described for glucosinolate analysis was diluted  
240 1:10 (v/v) mixed with a stock solution containing 10 $\mu$ g/mL  $^{13}\text{C}$ -,  $^{15}\text{N}$ -labelled amino acids  
241 (Algal amino acids  $^{13}\text{C}$ ,  $^{15}\text{N}$ , Isotec, Miamisburg, US). The resulting samples were filtered  
242 (Durapore®0.22 $\mu$ m PVDF filters, Merck Millipore, Tullagreen, Ireland) and used directly for  
243 LC-MS/MS analysis. Chromatography was performed on an Advance UHPLC system (Bruker,  
244 Bremen, Germany) with a Zorbax Eclipse XDB-C18 column (100 $\times$ 3.0 mm, 1.8  $\mu$ m, Agilent  
245 Technologies, Germany). Formic acid (0.05% (v/v) in water and acetonitrile (supplied with  
246 0.05% (v/v) formic acid) were employed as mobile phases A and B, respectively. The elution  
247 profile was: 0–1.2 min with 3% B; 1.2–4.3 min with 3–65% B; 4.3–4.4 min with 65–100% B;  
248 4.4–4.9 min with 100% B, 4.9–5.0 min with 100-3% B and 5.0–6.0 min with 3% B. Mobile

249 phase flow rate was 500 µl/min and column temperature was maintained at 40°C. LC was  
250 coupled to an EVOQ Elite Triple Quad mass spectrometer (Bruker, Bremen, Germany)  
251 equipped with electrospray ionisation. The ion spray voltage was maintained at 3000 V or  
252 –4000 V in positive or negative ionisation mode, respectively. Cone temperature was set to  
253 300°C and cone gas flow to 20psi. Heated probe temperature was set to 400°C and probe gas  
254 flow set to 50 psi. Nebulising gas was set to 60 psi and collision gas to 1.6m Torr. Nitrogen  
255 was used as both cone gas and nebulizing gas and argon as collision gas. MRMs for the <sup>13</sup>C,  
256 <sup>15</sup>N-labelled amino acids were chosen as previously described (Docimo *et al.* 2012). Response  
257 factors for quantification of amino acids, SAM and cystathione had been calculated previously  
258 based on dilution series of the respective analytes (Petersen, Crocoll & Halkier 2019).

259

#### 260 **Statistical analyses of metabolite data**

261 All the statistical analysis were performed in R environment v 3.5.1 (RRID:SCR\_000432).  
262 Numerical data obtained from analysis of amino acids, GSLs and total pigments were subjected  
263 to statistical analysis using one-way ANOVA with statistical significance at the level of  $P <$   
264 0.05, followed by Tukey's comparison in case distributions followed normality and  
265 homoscedasticity, whereas Kruskal-Wallis test was applied in the rest of the cases.  
266 Black Magic anthocyanins content was analyzed with Student's T-test and significance level  
267 of  $P < 0.05$  is denoted by an asterisk.

268

269

## 270 **Results**

### 271 **Transcript profiling of Arabidopsis leaves after long-term acclimation to high light and** 272 **elevated temperature**

273 To gain insights into how growth under high light and moderately elevated temperature might  
274 affect metabolic processes in brassicaceous plants, we took advantage of the genetic resources  
275 available for Arabidopsis. First we performed microarray analysis of Arabidopsis grown under  
276 moderate growth light and moderated temperature (GL; 130  $\mu\text{mol photons m}^{-2}\text{s}^{-1}/22^\circ\text{C}$ ) or  
277 acclimated to high light and elevated temperature (HL+ET; 800  $\mu\text{mol photons m}^{-2}\text{s}^{-1}/28^\circ\text{C}$ )  
278 (Figure 1a). Arabidopsis responded to a two-week growth period under HL+ET by visually  
279 observable accumulation of purple pigments (Figure 1a). To determine the effects of long-term  
280 HL+ET acclimation on gene expression, genes with  $>2$  FC (p-value  $<0.05$ ) differential  
281 expression in plants acclimated to HL+ET were identified, in comparison to plants grown in  
282 GL (Figure 1b; Table S1). Gene Ontology (GO) enrichment among differentially expressed  
283 genes revealed that the main processes up-regulated in response to long-term HL+ET  
284 acclimation included anthocyanin biosynthesis and metabolism, flavonoid metabolism and  
285 abiotic stress responses (Figure 1b). Genes related to photosynthesis and light harvesting, in  
286 contrast, were among the most down-regulated. Notably, GO categories related to defense  
287 responses, salicylic acid (SA) signaling and indole GSL metabolism were also over-represented  
288 among the down-regulated genes, when compared to plants grown in GL (Figure 1b; Table  
289 S1).

290

291 Next we utilized publicly available Arabidopsis transcriptomic datasets to determine how the  
292 effects of long-term HL+ET exposure differ from short-term HL treatments. Transcripts with  
293  $>2$  FC (p-value  $<0.05$ ) differential expression in the long-term HL+ET-acclimated plants  
294 (Supplementary Table S1) were selected and their abundance was assessed in the publicly

295 available datasets obtained from plants exposed to various short-term HL treatments  
296 (summarized in Supplementary Table S2), ranging from 30 minutes to 6 hours as detailed in  
297 Supplementary Table S3.

298

299 Hierarchical clustering analysis grouped the short term treatments into two clusters, early time  
300 points (30 min, 1 h and 2 h) and later ones (3h, 4h and 6 h) (Figure 2). The analysis also revealed  
301 temporal HL-induced transcriptional responses, which formed seven main clusters (Figure 2;  
302 Table S3). Cluster 1 contained transcripts whose abundance became reduced already at early  
303 time points of HL illumination. This early-responding cluster was enriched in GO terms related  
304 to biotic stress and cell wall metabolism (Table S4; Figure S1a). Clusters 2 and 3 comprised of  
305 transcripts that showed reduced abundance almost exclusively in the long-term HL dataset  
306 (Tables S5 and S6; Figure S1b,c). Clusters 4 and 6 in turn included transcripts with increased  
307 abundance upon long-term HL acclimation (Table S8; Figure S1e). Clusters 5 and 7 comprised  
308 transcripts whose abundance was increased in the long-term high light dataset but varied  
309 between the short-term HL (Tables S7 and S9; Figure S1d,f).

310

311 Comparison of the sets of genes differentially expressed in the long-term and representative  
312 short-term HL treatments identified 49 genes differentially expressed in response to every HL  
313 treatment (marked in blue in Table S3) and 1469 genes, which were differentially expressed  
314 exclusively upon acclimation to long-term HL+ET, but not in any of the short-term light shifts  
315 (Figure 3; Table S3). Within this group, GO enrichment analysis of transcripts with increased  
316 abundance specifically in long-term HL+ET revealed over-representation of categories related  
317 to transcriptional regulation, membrane transport and regulation of biosynthetic processes and  
318 biosynthesis of flavonoids (Table S10; Figure S2a). Among transcripts with reduced

319 abundance specific to long-term HL+ET acclimation, GO categories related to chlorophyll  
320 biosynthesis, photosynthetic light-harvesting, DNA integrity and biotic stress responses were  
321 significantly over-represented (Table S11; Figure S2b).

322

323 **Light intensity-dependent phenotypic characteristics in differentially pigmented kale**  
324 **varieties**

325 The enrichment of genes related to anthocyanins and GSL in the Arabidopsis long-term  
326 HL+ET transcriptome (Figure 1) prompted us to assess the effect of growth conditions on the  
327 contents of these nutritionally important compounds in kales, which are commercially  
328 important leafy vegetables. Two varieties of *Brassica oleracea* convar. *acephala*, Half Tall and  
329 Black Magic with differential pigmentation patterns, were selected for the analysis. Growing  
330 the kales under  $800 \mu\text{mol photons m}^{-2} \text{sec}^{-1}$  at  $28^{\circ}\text{C}$  triggered typical high-light-induced  
331 morphological responses, such as shorter petioles, reduced height and thicker leaves (Figure  
332 4). In Black Magic, the light avoidance response was additionally evident as vertical  
333 disposition of the leaves, while Half Tall showed a twisted leaf morphology when grown under  
334 HL (Figure 4).

335

336 The effect of HL+ET acclimation on the photosynthetic capacity of the two kale varieties was  
337 assessed by comparing the performance of the photosynthetic light reactions between Black  
338 Magic and Half Tall grown in either GL or HL+ET, using a DUAL-PAM-100. The rates of  
339 photosynthetic electron transport (ETR) through PSII and PSI were higher in Black Magic  
340 leaves from both GL and HL+ET, in comparison to Half Tall leaves, at actinic irradiances  
341 above  $125 \mu\text{mol photons m}^{-2} \text{s}^{-1}$  (Figure 5a,b). Furthermore, ETR(II) and ETR(I) in HL+ET-  
342 grown plants were higher than their GL-grown counterparts at 500 and  $1000 \mu\text{mol photons m}^{-2}$   
343  $\text{s}^{-1}$  actinic light. Leaves from HL+ET-grown plants demonstrated significantly lower NPQ at

344 50  $\mu\text{mol photons m}^{-2} \text{ s}^{-1}$  than GL-grown plants, while NPQ in HL+ET-grown Black Magic  
345 leaves was also significantly lower than all other samples at 125  $\mu\text{mol photons m}^{-2} \text{ s}^{-1}$ . At 500  
346 and 1000  $\mu\text{mol photons m}^{-2} \text{ s}^{-1}$ , Half Tall leaves had higher NPQ than Black Magic leaves,  
347 irrespective of growth conditions, while NPQ did not differ significantly between GL- and  
348 HL+ET-grown plants of each variety at these irradiances (Figure 5c).

349

350 The purple pigmentation of Black Magic became intensified upon growth under HL+ET and  
351 accumulation of protective pigments was evident on both adaxial and abaxial sides of the leaves  
352 (Figure 4b). Spectrophotometric analysis further indicated elevated amounts of both  
353 anthocyanins and carotenoids in HL+ET-acclimated Black Magic leaves (Figure 6). Half Tall,  
354 in contrast, was devoid of this common protective response and did not undergo light-induced  
355 accumulation of these pigments (Figure 6).

356

357 For more detailed assessment of anthocyanin contents, kale leaf extracts were analyzed by  
358 UPLC-ESI-MS/MS and the detected anthocyanins were qualitatively described based on mass  
359 spectra, UV spectra and comparison to previously published literature (Olsen, Aaby & Borge  
360 2010; Olsen, Grimmer, Aaby, Saha & Borge 2012) (Table 1). In Black Magic, ten different  
361 compounds were detected (Figure S3). The anthocyanins existed in different acylated forms  
362 with sinapic acid, ferulic acid, caffeic acid and *p*-coumaric acid as the predominant acyl donors  
363 (Table 1). Compounds 9 and 10, identified as cyanidin-3-sinapoyl-feruloyl-diglucoside-5-  
364 glucoside and cyanidin-3-disinapoyl-diglucoside-5-glucoside, respectively, were the most  
365 abundant anthocyanins detected in Black Magic (Table 1). In Half Tall, only trace amounts of  
366 anthocyanins were detected and individual compounds could therefore not be reliably  
367 identified. Quantification of total anthocyanins revealed that the generally higher levels in  
368 Black Magic significantly increased upon acclimation to HL+ET (Figure 7).



369

### 370 **Light-induced changes in amino acids in kale leaves**

371 Amino acid metabolism provides precursors for the biosynthesis of complex chemical  
372 structures, including some classes of specialized metabolites. Analysis of amino acids revealed  
373 an overall similarity between the amino acid profiles of Half Tall and Black Magic, with the  
374 exception of proline and cysteine, the contents of which differed between the varieties (Figure  
375 8). Both Half Tall and Black Magic responded to HL+ET acclimation by diminished amounts  
376 of several amino acids. The levels of aspartic acid and some of its derivatives, including  
377 asparagine, lysine, threonine, isoleucine and methionine, as well as the contents of the  
378 metabolic intermediates L-cystathionine and SAM, became reduced in both kale varieties  
379 (Figure 8). Similarly, the contents of glutamate, arginine, alanine, serine, glycine and histidine  
380 declined under high light. In contrast, the contents of proline and leucine showed a trend  
381 towards increased levels in both varieties when the plants grew under HL+ET (Figure 8). The  
382 contents of phenylalanine, the precursor for the biosynthesis of phenolic pigments and aromatic  
383 GSLs did not vary between the treatments (Figure 8).

384

### 385 **SAHH complex formation in differentially light-acclimated kales**

386 The HL+ET-induced reduction in the levels of methionine and SAM (Figure 8) suggested  
387 alterations in the activated methyl cycle, where SAHH is the key enzyme responsible for the  
388 maintenance of trans-methylation capacity (Rahikainen *et al.* 2018). Therefore, we next studied  
389 whether the abundance of SAHH differs between the differentially light and temperature -  
390 acclimated kales. Separation of the proteins by SDS-PAGE and subsequent analysis by  
391 immunoblotting revealed no light-dependent adjustments in the total abundance of SAHH  
392 (Figure 9a). Analysis by native gels in turn revealed the presence of SAHH in oligomeric  
393 complexes in both Half Tall and Black Magic (Figure 9b), as previously observed in

394 Arabidopsis leaf extracts (Rahikainen *et al.* 2017). One of the SAHH-containing complexes  
395 observed in the kale varieties corresponded to the abundant Arabidopsis SAHH complex 4  
396 (Rahikainen *et al.*, 2017), as deduced from its migration on CN-gels (Figure 9b). In  
397 Arabidopsis, increased abundance of SAHH complex 4 correlated with increased abundance  
398 of 4MO-I3M (Rahikainen *et al.* 2018). In kales, this oligomeric composition was present as a  
399 protein band doublet, comprising a prominent high MW band and a less abundant low MW  
400 band (Figure 9b). In the HL-acclimated kales, the lower MW Complex 4 band was barely  
401 detectable (Figure 9b).

402

### 403 **Glucosinolate profiles of differentially high-light-acclimated kales**

404 Next we analysed foliar GSL profiles in differentially light-acclimated kales. The analysis  
405 detected three indole GSLs, eight aliphatic GSLs and one benzenic GSL compound. The  
406 unmodified indole GSL indolyl-3-ylmethyl GSL (I3M; glucobrassicin) can be hydroxylated in  
407 position 1 or 4 (Pfalz *et al.* 2011), forming metabolic intermediates that are subsequently  
408 methylated by indole GSL methyltransferases (IGMTs), generating the modified indole GSLs  
409 NMO-I3M (*N*-methoxy-indol-3-yl-methyl GSL) and 4MO-I3M (4-methoxy-indol-3-yl-methyl  
410 GSL) (Pfalz *et al.* 2016).

411

412 The contents of indole GSLs showed both light intensity-related and cultivar-dependent  
413 changes. Black Magic showed an overall higher content of indole GSL, which declined under  
414 long-term HL+ET irradiation (Figure 10a). On the contrary, the total content of indole GSLs  
415 in Half Tall did not display HL+ET-dependent changes (Figure 10a). Interestingly, the level of  
416 4MO-I3M decreased upon HL+ET acclimation in both varieties (Figure 10c). The level of  
417 NMO-I3M in Black Magic showed an opposite trend with respect to 4MO-I3M, with a  
418 significant increase in HL+ET-acclimated Black Magic leaves (Figure 10d).

419

420 The overall content of aliphatic methionine-derived GSL increased upon HL+ET acclimation  
421 in both Half Tall and Black Magic, but the individual GSL profiles showed significant cultivar-  
422 dependent differences (Figure 11a). The biosynthesis of aliphatic GSL comprises three main  
423 steps: elongation of the amino acid chain, formation of the core GSL structure and modification  
424 of the side chain. As expected for Brassica species (Verkerk *et al.* 2009), aliphatic GSLs with  
425 C3-C5, referring to the number of carbons in their aliphatic side chains, were detected (Figure  
426 11). Half Tall showed high contents of the C3 aliphatic GSLs 3-methylthiopropyl GSL (3MTP;  
427 glucoiberverin), 3-methylsulfinylpropyl GSL (3MSP; glucocheirolin) and 2-propenyl GSL  
428 (2PROP GSL; sinigrin), which were barely detectable in Black Magic (Figure 11c). In addition,  
429 3-butenyl GSL (3BUT GSL) and 2(R)-2-hydroxy-3-butenyl GSL (2R-OH-3BUT GSL;  
430 progoitrin) were abundant in Half Tall but not in Black Magic (Figure 11d).

431

432 In contrast to Half Tall, Black Magic contained the C4 aliphatic GSL 4-methylthiobutyl GSL  
433 (4MTB GSL; glucoerucin) and was particularly rich in 4-methylsulfinylbutyl GSL (4MSB  
434 GSL; glucoraphanin) (Figure 11d). In addition, Black Magic accumulated high level of the  
435 aromatic 2-phenylethyl GSL (2PE GSL; gluconasturtiin), especially upon acclimation to  
436 HL+ET (Figure 12). The content of 5-methylthiopentyl GSL (5MSP GSL; glucoberteroin), in  
437 turn, did not show cultivar- or light intensity-dependent adjustments (Figure 11e). These  
438 findings suggest that HL+ET acclimation promotes the accumulation of aliphatic GSL,  
439 irrespective of the nature of the abundant GSL species, which is highly cultivar-dependent.

440

## 441 **Discussion**

442 Light intensities that exceed the photosynthetic capacity of a plant in a given environment may  
443 result in imbalanced accumulation of redox-active intermediates and cause damage to the

444 photosynthetic protein complexes (Aro, Virgin & Andersson 1993; Muller 2001; Miyake 2010;  
445 Kono, Noguchi & Terashima 2014; Tiwari *et al.* 2016; Gu *et al.* 2017). Photosynthetic  
446 organisms therefore undergo coordinated adjustments in gene expression and metabolism to  
447 optimize their fitness in the prevailing growth environment. Under natural conditions,  
448 fluctuations in light intensity are commonly seen as an environmental stress factor, while in  
449 greenhouse conditions, artificial manipulation of plant metabolomes by alterations in growth  
450 conditions may allow improved production of desired end products. However, the basic  
451 understanding of how the growth conditions affect the chemical composition of crops is still  
452 limited. In this study, we aimed towards understanding how long-term growth under a  
453 combination of high irradiance and elevated temperature affects the chemical composition and  
454 growth in differentially pigmented varieties of kale.

455

456 **Long-term plant acclimation to high light involves reprogramming of gene expression**  
457 **and protective metabolism**

458 Light-induced acclimation responses depend on the severity and the duration of excess  
459 irradiation. A number of studies have elaborated the transient nature of HL-induced changes in  
460 foliar transcriptomes (Vogel *et al.* 2014; Crisp *et al.* 2017), while long-term effects on  
461 transcriptomic adjustments have drawn less attention. Here we assessed the transcript profile  
462 of HL+ET-acclimated *Arabidopsis* leaves (Supplementary Table S1), and compared the  
463 acclimation response to previously reported short-term HL-induced transcriptional adjustments  
464 (Kleine, Kindgren, Benedict, Hendrickson & Strand 2007; Jung *et al.* 2013; Gläßer *et al.* 2014;  
465 Schmitz *et al.* 2014) to elucidate how long-term growth under HL affects physiological  
466 processes in *Arabidopsis*.

467

468 Long-term HL+ET acclimation of Arabidopsis was accompanied by increased abundance of  
469 transcripts related to the biosynthesis of flavonoids and anthocyanins, and reduced transcript  
470 abundance for proteins involved in photosynthetic light harvesting, when compared to plants  
471 grown under moderate GL (Figure 1b). This protective response was evident also as visually  
472 observable accumulation of blue and purple pigments, which accumulate in leaf epidermal cells  
473 to protect HL+ET-acclimated leaves against light stress (Figure 1a; Chalker-Scott, 1999). A  
474 distinguishing feature between long-term HL+ET-acclimated leaves and short-term light  
475 stressed ones was reduced abundance of transcripts in GO categories related to biotic stress  
476 responses, in comparison to non-stressful GL conditions (Table S11), suggesting alleviation of  
477 defense priming and suppression of hypersensitive cell death in leaves acclimated to the  
478 potentially stressful abiotic cues. Long-term morphological adjustments, including  
479 development of thick leaves rich in anthocyanins and other phenolic metabolites, may be  
480 deterrent against pathogens and herbivores and promote cross-tolerance against biotic stress  
481 agents.

482

483 Higher levels of carotenoids and anthocyanins were detected in Black Magic kale, in  
484 comparison to Half Tall, and these were shown to increase significantly after growth under  
485 HL+ET (Figure 6). Upregulation of the protective pigments correlated with increased  
486 photosynthetic electron transport under high irradiance in Black Magic, which was also  
487 improved after HL+ET growth, which can be attributed to lower levels of NPQ in Black Magic  
488 (Figure 5). Since many of the protective metabolites have health-promoting nutritional effects  
489 in humans (Verkerk *et al.* 2009; Dinkova-Kostova & Kostov 2012), light-induced adjustments  
490 in foliar chemical composition can directly impact the nutritional value of leafy vegetables.  
491 Therefore, long-term exposure to warm high light conditions can be applied as a tool to trigger

492 the production of health- and taste-related compounds with the aim to increase the commercial  
493 value of crops in greenhouse cultivation.

494

495 **The kale varieties contain increased amounts of genotype-dependent aliphatic**  
496 **glucosinolate structures when grown under high light and elevated temperature**

497 GSLs are major defensive compounds commonly associated with plant-biotic interactions in  
498 the order Brassicales (Halkier & Gershenzon 2006; Hopkins, van Dam & van Loon 2009). To  
499 date, around 130 GSL species have been identified and their occurrence in various plant cells,  
500 tissues (Agerbirk & Olsen 2012) and species under different developmental stages (Brown,  
501 Tokuhisa, Reichelt & Gershenzon 2003) and environmental conditions (Cartea, Velasco,  
502 Obregón, Padilla & de Haro 2008; Huseby *et al.* 2013; Martínez-Ballesta, Moreno & Carvajal  
503 2013) has been extensively characterized. Metabolite profiling of the Half Tall and Black  
504 Magic varieties of kale revealed that ambient growth light and temperature can significantly  
505 affect the contents of both indole and aliphatic GSLs in kale (Figures 10 and 11).

506

507 The methionine-derived aliphatic GSLs form a predominant group of natural compounds in *A.*  
508 *thaliana* and many crops in the Brassicaceae family. We show that the Half Tall and Black  
509 Magic varieties of kale undergo a HL-induced increase in total aliphatic GSL levels, although  
510 the individual GSL species display cultivar-dependent changes (Figure 11). Black Magic  
511 accumulated aliphatic GSLs with a length of 4 carbons in their aliphatic side chain, while  
512 aliphatic side chains of 3 carbons predominated in Half Tall, presumably due to occurrence of  
513 different biosynthetic machineries in these two varieties.

514

515 The committed enzyme responsible for the chain elongation step in the biosynthesis of aliphatic  
516 GSLs is methylthioalkylmalate synthase (MAM; Kliebenstein *et al.*, 2001; Kroymann, 2001).

517 The length of the aliphatic side-chain is determined by the number of times it undergoes a  
518 MAM-driven elongation (Kliebenstein *et al.* 2001b; Kroymann 2001), but it is notable that  
519 MAM isoforms elongate the methionine-derived keto-acids in a chain-length-dependent  
520 manner. The profile of aliphatic GSL species with different chain length is therefore essentially  
521 determined by the MAM isoforms that are present in a given plant species, cultivar or ecotype  
522 (Kroymann, Donnerhacke, Schnabelrauch & Mitchell-Olds 2003; Kroymann *et al.* 2006). In  
523 Arabidopsis, MAM is present as three different isoforms, MAM1, MAM2 and MAM3  
524 (Benderoth, Pfalz & Kroymann 2009). MAM2 is responsible for the first elongation cycle of  
525 methionine and forms 3-carbon aliphatic side-chain, whereas MAM1 is able to generate both  
526 3-carbon and 4-carbon aliphatic side-chains. The differential profiles of aliphatic GSLs in Half  
527 Tall and Black Magic (Figure 11b,c) suggest that the kale varieties possess different isoforms  
528 of MAM. The lack of 3-carbon aliphatic side-chains in Black Magic suggests that this variety  
529 is devoid of MAM2 (Figure 11c,d). In contrast, in Half Tall that accumulates 3-carbon aliphatic  
530 side-chain GSL, an enzyme with the biochemical properties of the Arabidopsis MAM2 must  
531 be present. Contrastingly, high content of the 4-carbon aliphatic side-chain GSL 4MSP in  
532 Black Magic (Figure 11c,d) suggests the occurrence of a MAM1-like enzyme. Altogether,  
533 while the growth light intensity seemingly modulates the overall accumulation of GSLs, the  
534 side-chain carbon length of the aliphatic GSLs is genotype dependent.

535

536 Another relevant polymorphic locus controlling GSL profiles is *GSL-AOP* (Magrath *et al.*  
537 1994; Mithen, Clarke, Lister & Dean 1995). It operates downstream of biosynthesis of the  
538 GSL core structure, and its presence or absence determines whether a given species or cultivar  
539 predominantly accumulates hydroxyalkyl GSLs, alkenyl GSLs or methylsulfinyl GSLs  
540 (Kliebenstein *et al.*, 2001a,b, 2007). In Half Tall, the presence of 2-propenyl GSL (alkenyl  
541 GSL) pointed to the presence of a functional AOP2 in this variety (Figure 8c). In contrast,

542 Black Magic accumulated methylsulfinyl GSL in the form of 4-methylsulfinylbutyl GSL  
543 (Figure 8d), which is not further converted to other glucosinolate structures, due to absence of  
544 the AOP enzymes in this variety.

545 The biosynthetic machineries behind aliphatic GSL biosynthesis are drawing increasing  
546 research interest, as understanding the molecular machineries responsible for the enormous  
547 GSL diversity may pave the way for traditional breeding or biotechnological manipulation of  
548 GSL content and their pungent metabolites in Brassica crops (Petersen, Wang, Crocoll &  
549 Halkier 2018; Kumar *et al.* 2019). In this study, we provide evidence indicating that besides  
550 the evolutionary and biochemical foundations of GSL metabolism (Kumar *et al.* 2019),  
551 optimized light conditions can be applied to modulate the GSL profiles to increase the contents  
552 of beneficial GSL compounds while decreasing those with deleterious effects.

553

#### 554 **High light stress as a noninvasive means for cultivation of healthier plants**

555 The biosynthetic machineries of plants are highly responsive to light and their metabolite  
556 profiles can therefore be non-invasively manipulated by changes in the intensity and spectral  
557 quality of light (Cargnel, Demkura & Ballaré 2014). In greenhouse cultivation, manipulation  
558 of metabolic and developmental processes by alterations in growth conditions can therefore be  
559 applied to enhance the production of desired compounds. GSLs have beneficial nutritional  
560 effects but detrimental effects have also been reported (Greer & Deeney 1959; Tripathi &  
561 Mishra 2007; Romeo, Iori, Rollin, Bramanti & Mazzon 2018; Tafakh *et al.* 2019).

562

563 In this study, GSL profiling provided insights to differential nutritional qualities of kale  
564 varieties. The purple variety, Black Magic, was rich in the health-promoting 4MSB GSL  
565 (glucoraphinin) and 2PE (glucocasturtiin), and their contents became further increased when



566 the plants were grown under HL (Figures 11d and 12). Among GSL structures with potential  
567 harmful effects, progoitrin, also known as 2R-2-OH-3-butenyl GSL, has been associated with  
568 bitter taste and long intake periods may cause goiter in animals (Greer 1957; Felker *et al.* 2016).  
569 It is therefore notable, that in Black Magic, the levels of 2R-2-OH-3-butenyl GSL were below  
570 detection in both light conditions studied (Figure 11d). In contrast, Half Tall responded to HL  
571 growth by accumulating 2R-2-OH-3-butenyl GSL (Figure 11d).

572

573 Several GSL structures and their breakdown products have been reported beneficial in human  
574 diet (Traka & Mithen 2009; Gupta *et al.* 2015; Lee *et al.* 2019). Among indole GSLs,  
575 degradation of 4MO-I3M yields indole-3-carbinol (I3C), which was recently demonstrated to  
576 have anti-cancerous activity through inhibition of the HECT-type E3 ubiquitin ligase WWP1  
577 that promotes tumorigenesis in several cell types (Lee *et al.* 2019). Enzymatic processing of  
578 the aliphatic 4MSB GSL and 2PE GSL into sulphoraphane and phenethyl isothiocyanate  
579 (PEITC), respectively, yields metabolites with health-beneficial properties through  
580 anticarcinogenic and chemo-protectant activities (Cheung & Kong 2010; Jiang *et al.* 2018).  
581 These GSL-derived metabolites can reduce the amounts of carcinogens by inhibiting phase I  
582 enzymes and activating phase II enzymes (Eastham, Howard, Balachandran, Pasco & Claudio  
583 2018). Moreover, growth-inhibitory effects for sulforaphane in head, neck and prostate cancer  
584 cells have been reported (Singh *et al.* 2005; Gupta *et al.* 2015) and PEITC has been associated  
585 with prevention of the growth of oral cancer cell lines (Chen *et al.* 2012). Currently, their  
586 potential effects on different cancer types is a matter of extensive exploration (Castro *et al.*  
587 2019; Mitsiogianni *et al.* 2019; Upadhyaya, Liu & Dey 2019; Yin *et al.* 2019). Sulphoraphane  
588 has also been proposed as a potential therapy for precluding vascular complications in diabetes  
589 (Yamagishi & Matsui 2016). Beneforté® Broccoli, highly enriched in 4MSB-GSL, is

590 commercially available worldwide and crop industry continues prompting research towards  
591 generation of bio-refined crops.

592

593 Growth of Black Magic under high irradiance promoted the accumulation of health-promoting  
594 aliphatic GSLs and anthocyanins, while the disadvantageous GSL structures remained below  
595 detection limits (Figures 6 and 11). On the other hand, reflecting the reduced transcript  
596 abundance for genes related to methoxylation of indole GSLs in the Arabidopsis long-term HL  
597 transcriptome, both Black Magic and Half Tall displayed reduced levels of the indolic 4MO-  
598 I3M when grown under HL+ET (Figure 10). Altogether, growth light intensity is a key factor  
599 that can impact the accumulation of beneficial metabolites in commercially valuable varieties  
600 of Brassica species.

## References

- Agerbirk N. & Olsen C.E. (2012) Glucosinolate structures in evolution. *Phytochemistry* **77**, 16–45.
- Aro E.M., Virgin I. & Andersson B. (1993) Photoinhibition of Photosystem II. Inactivation, protein damage and turnover. *BBA - Bioenergetics* **1143**, 113–134.
- Bell L., Oloyede O.O., Lignou S., Wagstaff C. & Methven L. (2018) Taste and Flavor Perceptions of Glucosinolates, Isothiocyanates, and Related Compounds. *Molecular Nutrition and Food Research* **62**.
- Benderoth M., Pfalz M. & Kroymann J. (2009) Methylthioalkylmalate synthases: Genetics, ecology and evolution. *Phytochemistry Reviews* **8**, 255–268.
- Brown P.D., Tokuhisa J.G., Reichelt M. & Gershenzon J. (2003) Variation of glucosinolate accumulation among different organs and developmental stages of *Arabidopsis thaliana*. *Phytochemistry* **62**, 471–481.
- Cargnel M.D., Demkura P. V. & Ballaré C.L. (2014) Linking phytochrome to plant immunity: low red: Far-red ratios increase *Arabidopsis* susceptibility to *Botrytis cinerea* by reducing the biosynthesis of indolic glucosinolates and camalexin. *New Phytologist* **204**, 342–354.
- Cartea M.E., Velasco P., Obregón S., Padilla G. & de Haro A. (2008) Seasonal variation in glucosinolate content in *Brassica oleracea* crops grown in northwestern Spain. *Phytochemistry* **69**, 403–410.
- Castro N.P., Rangel M.C., Merchant A.S., MacKinnon G., Cuttitta F., Salomon D.S. & Kim Y.S. (2019) Sulforaphane suppresses the growth of triplenegative breast cancer stem-like cells in vitro and in vivo. *Cancer Prevention Research* **12**, 147–158.
- Celenza J.L., Quiel J.A., Smolen G.A., Merrih H., Silvestro A.R., Normanly J. & Bender J. (2005) The *Arabidopsis* ATR1 Myb Transcription Factor Controls Indolic Glucosinolate Homeostasis. *Plant physiology* **137**, 253–262.
- Chalker-Scott L. (1999) Environmental significance of anthocyanins in plant stress responses. *Photochemistry and Photobiology* **70**, 1–9.
- Chan K.X., Phua S.Y. & Breusegem F. Van (2019) Secondary sulfur metabolism in cellular signalling and oxidative stress responses. *Journal of Experimental Botany*.
- Chen H. & Boutros P.C. (2011) VennDiagram: A package for the generation of highly-customizable Venn and Euler diagrams in R. *BMC Bioinformatics* **12**, 35.

- Chen P.-Y., Lin K.-C., Lin J.-P., Tang N.-Y., Yang J.-S., Lu K.-W. & Chung J.-G. (2012) Phenethyl Isothiocyanate (PEITC) Inhibits the Growth of Human Oral Squamous Carcinoma HSC-3 Cells through G0/G1 Phase Arrest and Mitochondria-Mediated Apoptotic Cell Death. *Evidence-Based Complementary and Alternative Medicine* **2012**, 1–12.
- Cheung K.L. & Kong A.-N. (2010) Molecular Targets of Dietary Phenethyl Isothiocyanate and Sulforaphane for Cancer Chemoprevention. *The AAPS Journal* **12**, 87–97.
- Crisp P.A., Ganguly D.R., Smith A.B., Murray K.D., Estavillo G.M., Searle I., ... Pogson B.J. (2017) Rapid Recovery Gene Downregulation during Excess-Light Stress and Recovery in Arabidopsis. *The Plant Cell* **29**, 1836–1863.
- Crocoll C., Halkier B.A. & Burow M. (2016) Analysis and quantification of glucosinolates. *Current protocols in plant biology* **1**, 385–409.
- Dinkova-Kostova A.T. & Kostov R. V (2012) Glucosinolates and isothiocyanates in health and disease. *Trends in molecular medicine* **18**, 337–47.
- Docimo T., Reichelt M., Schneider B., Kai M., Kunert G., Gershenzon J. & D’Auria J.C. (2012) The first step in the biosynthesis of cocaine in *Erythroxylum coca*: the characterization of arginine and ornithine decarboxylases. *Plant molecular biology* **78**, 599–615.
- Eastham L.L., Howard C.M., Balachandran P., Pasco D.S. & Claudio P.P. (2018) Eating Green: Shining Light on the Use of Dietary Phytochemicals as a Modern Approach in the Prevention and Treatment of Head and Neck Cancers. *Current Topics in Medicinal Chemistry* **18**, 1–10.
- Felker P., Bunch R. & Leung A.M. (2016) Concentrations of thiocyanate and goitrin in human plasma, their precursor concentrations in brassica vegetables, and associated potential risk for hypothyroidism. *Nutrition Reviews* **74**, 248–258.
- Francisco M., Tortosa M., Martínez-Ballesta M. del C., Velasco P., García-Viguera C. & Moreno D.A. (2017) Nutritional and phytochemical value of Brassica crops from the agri-food perspective. *Annals of Applied Biology* **170**, 273–285.
- Frerigmann H., Piślewska-Bednarek M., Sánchez-Vallet A., Molina A., Glawischnig E., Gigolashvili T. & Bednarek P. (2016) Regulation of Pathogen-Triggered Tryptophan Metabolism in *Arabidopsis thaliana* by MYB Transcription Factors and Indole Glucosinolate Conversion Products. *Molecular Plant* **9**, 682–695.
- Ge S. & Jung D. (2018) ShinyGO: a graphical enrichment tool for animals and plants. *bioRxiv*, 315150.

- Gigolashvili T., Berger B., Mock H.P., Müller C., Weisshaar B. & Flügge U.I. (2007) The transcription factor *HIG1/MYB51* regulates indolic glucosinolate biosynthesis in *Arabidopsis thaliana*. *Plant Journal* **50**, 886–901.
- Gläßer C., Haberer G., Finkemeier I., Pfannschmidt T., Kleine T., Leister D., ... Mayer K.F.X. (2014) Meta-analysis of retrograde signaling in *Arabidopsis thaliana* reveals a core module of genes embedded in complex cellular signaling networks. *Molecular Plant* **7**, 1167–1190.
- Gollan P.J., Tikkanen M. & Aro E.M. (2015) Photosynthetic light reactions: Integral to chloroplast retrograde signalling. *Current Opinion in Plant Biology* **27**, 180–191.
- Greer M. (1957) Goitrogenic Substances in Food. *The American Journal of Clinical Nutrition* **5**, 957–964.
- Greer M.A. & Deeney J. (1959) Antithyroid activity elicited by the ingestion of pure Progoitrin, a naturally occurring thioglycoside of the turnip family. *J Clin Invest.*, 1465–1474.
- Gu J., Zhou Z., Li Z., Chen Y., Wang Z., Zhang H. & Yang J. (2017) Photosynthetic Properties and Potentials for Improvement of Photosynthesis in Pale Green Leaf Rice under High Light Conditions. *Frontiers in Plant Science* **8**, 1–14.
- Gupta P., Wright S.E., Kim S.-H. & Srivastava S.K. (2015) Phenethyl Isothiocyanate: A comprehensive review of anti- cancer mechanisms. **1846**, 405–424.
- Halkier B.A. & Gershenzon J. (2006) Biology and Biochemistry of Glucosinolates. *Annual Review of Plant Biology* **57**, 303–333.
- Hopkins R.J., van Dam N.M. & van Loon J.J.A. (2009) Role of Glucosinolates in Insect-Plant Relationships and Multitrophic Interactions. *Annual Review of Entomology* **54**, 57–83.
- Hruz T., Laule O., Szabo G., Wessendorp F., Bleuler S., Oertle L., ... Zimmermann P. (2008) Genevestigator V3: A Reference Expression Database for the Meta-Analysis of Transcriptomes. *Advances in Bioinformatics* **2008**, 1–5.
- Huseby S., Koprivova A., Lee B.R., Saha S., Mithen R., Wold A.B., ... Kopriva S. (2013) Diurnal and light regulation of sulphur assimilation and glucosinolate biosynthesis in *Arabidopsis*. *Journal of Experimental Botany* **64**, 1039–1048.
- Jensen L.M., Halkier B.A. & Burow M. (2014) How to discover a metabolic pathway? An update on gene identification in aliphatic glucosinolate biosynthesis, regulation and transport. *Biological Chemistry* **395**, 529–543.
- Jeschke V. & Burow M. (2018) Glucosinolates. *eLS*, 15–30.

- Jiang X., Liu Y., Ma L., Ji R., Qu Y., Xin Y. & Lv G. (2018) Chemopreventive activity of sulforaphane. *Drug Design, Development and Therapy* **12**, 2905–2913.
- Jung H., Crisp P., Estavillo G., Cole B., Hong F., Mockler T., ... Chory J. (2013) Subset of heat-shock transcription factors required for the early response of Arabidopsis to excess light. *PNAS* **110**, 14474–14479.
- Katz E., Nisani S. & Chamovitz D.A. (2018) Indole-3-carbinol: a plant hormone combatting cancer. *F1000Research* **7**, 689.
- Kleine T., Kindgren P., Benedict C., Hendrickson L. & Strand A. (2007) Genome-Wide Gene Expression Analysis Reveals a Critical Role for CRYPTOCHROME1 in the Response of Arabidopsis to High Irradiance. *Plant Physiology* **144**, 1391–1406.
- Kliebenstein D.J., Gershenzon J. & Mitchell-olds T. (2001a) Comparative Quantitative Trait Loci Mapping of Aliphatic, Indolic and Benzylic Glucosinolate Production in. *Genetics*.
- Kliebenstein D.J., Kroymann J., Brown P., Figuth A., Pedersen D., Gershenzon J. & Mitchell-Olds T. (2001b) Genetic control of natural variation in Arabidopsis glucosinolate accumulation. *Plant physiology* **126**, 811–25.
- Kliebenstein D.J., Lambrix V.M., Reichelt M., Gershenzon J. & Mitchell-Olds T. (2007) Gene Duplication in the Diversification of Secondary Metabolism: Tandem 2-Oxoglutarate-Dependent Dioxygenases Control Glucosinolate Biosynthesis in Arabidopsis. *The Plant Cell* **13**, 681.
- Kolde R. (2019) pheatmap: Pretty Heatmaps. R package version 1.0. 12.
- Konert G., Rahikainen M., Trotta A., Durian G., Salojärvi J., Khorobrykh S., ... Kangasjärvi S. (2015) Subunits B'  $\gamma$  and B'  $\zeta$  of protein phosphatase 2A regulate photo-oxidative stress responses and growth in Arabidopsis thaliana. *Plant, Cell & Environment*, n/a-n/a.
- Kono M., Noguchi K. & Terashima I. (2014) Roles of the cyclic electron flow around PSI (CEF-PSI) and O<sub>2</sub>-dependent alternative pathways in regulation of the photosynthetic electron flow in short-term fluctuating light in Arabidopsis thaliana. *Plant and Cell Physiology* **55**, 990–1004.
- Kroymann J. (2001) A Gene Controlling Variation in Arabidopsis Glucosinolate Composition Is Part of the Methionine Chain Elongation Pathway. *Plant Physiology* **127**, 1077–1088.
- Kroymann J., Donnerhacke S., Schnabelrauch D. & Mitchell-Olds T. (2003) Evolutionary dynamics of an Arabidopsis insect resistance quantitative trait locus. *Proceedings of the National Academy of Sciences* **100**, 14587–14592.

- Kroymann J., Textor S., Benderoth M., Mitchell-Olds T., Windsor A.J. & Gershenzon J. (2006) Positive selection driving diversification in plant secondary metabolism. *Proceedings of the National Academy of Sciences* **103**, 9118–9123.
- Kumar R., Lee S.G., Augustine R., Reichelt M., Vassão D.G., Palavalli M.H., ... Bisht N.C. (2019) Molecular Basis of the Evolution of Methylthioalkylmalate Synthase and Diversity of Methionine-Derived Glucosinolates. *The Plant Cell*, tpc.00046.2019.
- Lee Y.-R., Chen M., Lee J.D., Zhang J., Lin S.-Y., Fu T.-M., ... Pandolfi P.P. (2019) Reactivation of PTEN tumor suppressor for cancer treatment through inhibition of a MYC-WWP1 inhibitory pathway. *Science* **364**, eaau0159.
- Magrath R., Banot F., Morgner M., Parkin I., Sharpe A., Lister C., ... Mithen A.A. (1994) Genetical Society of Great Britain Genetics of aliphatic glucosinolates. I. Side chain elongation in *Brassica napus* and *Arabidopsis thaliana*. *Heredity* **72**, 290–299.
- Martínez-Ballesta M. del C., Moreno D.A. & Carvajal M. (2013) The physiological importance of glucosinolates on plant response to abiotic stress in Brassica. *International Journal of Molecular Sciences* **14**, 11607–11625.
- Megna B.W., Carney P.R., Nukaya M., Geiger P. & Kennedy G.D. (2016) Indole-3-carbinol induces tumor cell death: Function follows form. *Journal of Surgical Research* **204**, 47–54.
- Mithen R., Clarke J., Lister C. & Dean C. (1995) Genetics of aliphatic glucosinolates. III. side chain structure of aliphatic glucosinolates in *Arabidopsis thaliana*. *Heredity* **74**, 210–215.
- Mitsiogianni, Koutsidis, Mavroudis, Trafalis, Botaitis, Franco, ... Panayiotidis (2019) The Role of Isothiocyanates as Cancer Chemo-Preventive, Chemo-Therapeutic and Anti-Melanoma Agents. *Antioxidants* **8**, 106.
- Miyake C. (2010) Alternative electron flows (water-water cycle and cyclic electron flow around PSI) in photosynthesis: Molecular mechanisms and physiological functions. *Plant and Cell Physiology* **51**, 1951–1963.
- Muller P. (2001) Non-Photochemical Quenching. A Response to Excess Light Energy. *Plant Physiology* **125**, 1558–1566.
- Olsen H., Aaby K. & Borge G.I.A. (2010) Characterization, quantification, and yearly variation of the naturally occurring polyphenols in a common red variety of curly kale (*Brassica oleracea* L. convar. *acephala* var. *sabellica* cv. 'Redbor'). *Journal of Agricultural and Food Chemistry* **58**, 11346–11354.
- Olsen H., Grimmer S., Aaby K., Saha S. & Borge G.I.A. (2012) Antiproliferative effects of



- fresh and thermal processed green and red cultivars of curly kale (*Brassica oleracea* L. convar. *acephala* var. *sabellica*). *Journal of Agricultural and Food Chemistry* **60**, 7375–7383.
- Pascual J., Rahikainen M. & Kangasjärvi S. (2017) Plant Light Stress. *eLS*, 1–6.
- Petersen A., Crocoll C. & Halkier B.A. (2019) De Novo production of benzyl glucosinolate in *Escherichia coli*. *Metabolic engineering*.
- Petersen A., Wang C., Crocoll C. & Halkier B.A. (2018) Biotechnological approaches in glucosinolate production. *Journal of Integrative Plant Biology* **60**, 1231–1248.
- Pfalz M., Mikkelsen M.D., Bednarek P., Olsen C.E., Halkier B.A. & Kroymann J. (2011) Metabolic Engineering in *Nicotiana benthamiana* Reveals Key Enzyme Functions in Arabidopsis Indole Glucosinolate Modification. *The Plant Cell* **23**, 716–729.
- Pfalz M., Mukhaimar M., Perreau F., Kirk J., Hansen C.I.C., Olsen C.E., ... Kroymann J. (2016) Methyl Transfer in Glucosinolate Biosynthesis Mediated by Indole Glucosinolate O-Methyltransferase 5. *Plant Physiology* **172**, 2190–2203.
- R Core T. (2018) R: A language and environment for statistical computing.
- Rahikainen M., Alegre S., Trotta A., Pascual J. & Kangasjärvi S. (2018) Trans-methylation reactions in plants: focus on the activated methyl cycle. *Physiologia Plantarum* **162**, 162–176.
- Rahikainen M., Trotta A., Alegre S., Pascual J., Vuorinen K., Overmyer K., ... Kangasjärvi S. (2017) PP2A-B $\gamma$  modulates foliar trans-methylation capacity and the formation of 4-methoxy-indol-3-yl-methyl glucosinolate in Arabidopsis leaves. *The Plant journal : for cell and molecular biology* **89**, 112–127.
- Romeo L., Iori R., Rollin P., Bramanti P. & Mazzon E. (2018) Isothiocyanates: An overview of their antimicrobial activity against human infections. *Molecules* **23**, 1–18.
- RStudio Team \_ (2018) RStudio: integrated development for R. 2018. *RStudio, Inc., Boston, MA*. URL <http://www.rstudio.com>. Accessed 7.
- Schmitz J., Heinrichs L., Scossa F., Fernie A.R., Oelze M.L., Dietz K.J., ... Häusler R.E. (2014) The essential role of sugar metabolism in the acclimation response of *Arabidopsis thaliana* to high light intensities. *Journal of Experimental Botany* **65**, 1619–1636.
- Sharma G.S., Singh M.K. & Mikawlawng K. (2014) Review Article the Glucosinolates-Myrosinase System : From Chemistry , Biology To Ecology. *International Journal of Current Research* **6**, 6481–6489.
- Sims D. & Gamon J. (2002) Relationships between leaf pigment content and spectral reflectance across a wide range of species, leaf structures and developmental stages.



*Remote Sensing of Environment* **81**, 337–354.

- Singh S. V., Srivastava S.K., Choi S., Lew K.L., Antosiewicz J., Xiao D., ... Herman-Antosiewicz A. (2005) Sulforaphane-induced cell death in human prostate cancer cells is initiated by reactive oxygen species. *Journal of Biological Chemistry* **280**, 19911–19924.
- Smyth G.K. (2004) Linear Models and Empirical Bayes Methods for Assessing Differential Expression in Microarray Experiments. *Statistical Applications in Genetics and Molecular Biology* **3**, 1–25.
- Sønderby I.E., Geu-Flores F. & Halkier B.A. (2010) Biosynthesis of glucosinolates - gene discovery and beyond. *Trends in Plant Science* **15**, 283–290.
- Spetea C., Rintamäki E. & Schoefs B. (2014) Changing the light environment : chloroplast Changing the light environment : chloroplast. **369**, 19–20.
- Sun C.C., Li S.J., Yang C.L., Xue R.L., Xi Y.Y., Wang L., ... Li D.J. (2015) Sulforaphane attenuates muscle inflammation in dystrophin-deficient mdx mice via NF-E2-related factor 2 (Nrf2)-mediated inhibition of NF-κB signaling pathway. *Journal of Biological Chemistry* **290**, 17784–17795.
- Tafakh M.S., Saidijam M., Ranjbarnejad T., Malih S., Mirzamohammadi S. & Najafi R. (2019) Sulforaphane, a Chemopreventive Compound, Inhibits Cyclooxygenase-2 and Microsomal Prostaglandin e Synthase-1 Expression in Human HT-29 Colon Cancer Cells. *Cells Tissues Organs* **206**, 46–53.
- Tiwari A., Mamedov F., Grieco M., Suorsa M., Jajoo A., Styring S., ... Aro E.M. (2016) Photodamage of iron-sulphur clusters in photosystem i induces non-photochemical energy dissipation. *Nature Plants* **2**.
- Traka M. & Mithen R. (2009) Glucosinolates, isothiocyanates and human health. *Phytochemistry Reviews* **8**, 269–282.
- Traka M.H. (2016) Health Benefits of Glucosinolates. *Advances in Botanical Research* **80**, 247–279.
- Tripathi M.K. & Mishra A.S. (2007) Glucosinolates in animal nutrition: A review. *Animal Feed Science and Technology* **132**, 1–27.
- Upadhyaya B., Liu Y. & Dey M. (2019) Phenethyl Isothiocyanate Exposure Promotes Oxidative Stress and Suppresses Sp1 Transcription Factor in Cancer Stem Cells. *International Journal of Molecular Sciences* **20**, 1027.
- Verkerk R., Schreiner M., Krumbein A., Ciska E., Holst B., Rowland I., ... Dekker M. (2009) Glucosinolates in Brassica vegetables: The influence of the food supply chain on

- intake, bioavailability and human health. *Molecular Nutrition and Food Research* **53**, 219–265.
- Vogel M.O., Moore M., König K., Pecher P., Alsharafa K., Lee J. & Dietz K.-J. (2014) Fast retrograde signaling in response to high light involves metabolite export, MITOGEN-ACTIVATED PROTEIN KINASE6, and AP2/ERF transcription factors in Arabidopsis. *The Plant cell* **26**, 1151–65.
- Wittstock U. & Burow M. (2010) Glucosinolate breakdown in Arabidopsis: mechanism, regulation and biological significance. *The arabidopsis book* **8**, e0134.
- Yamagishi S.I. & Matsui T. (2016) Protective role of sulphoraphane against vascular complications in diabetes. *Pharmaceutical Biology* **54**, 2329–2339.
- Yang W., Kortensniemi M., Yang B. & Zheng J. (2018) Enzymatic Acylation of Anthocyanins Isolated from Alpine Bearberry (*Arctostaphylos alpina*) and Lipophilic Properties, Thermostability, and Antioxidant Capacity of the Derivatives. *Journal of Agricultural and Food Chemistry* **66**, 2909–2916.
- Yin L., Xiao X., Georgikou C., Luo Y., Liu L., Gladkich J., ... Herr I. (2019) Sulforaphane Induces miR135b-5p and Its Target Gene, RASAL2, thereby Inhibiting the Progression of Pancreatic Cancer. *Molecular Therapy - Oncolytics* **14**, 74–81.
- Zeng X.Q., Chow W.S., Su L.J., Peng X.X. & Peng C.L. (2010) Protective effect of supplemental anthocyanins on Arabidopsis leaves under high light. *Physiologia Plantarum* **138**, 215–225.

## Tables

**Table 1. Identification of anthocyanins from Black Magic leaf extracts.**

| No | RT <sub>min</sub> | [M+H] <sup>+</sup> | Daughter ions (MS <sup>2</sup> ) | Tentative ID                                                     |
|----|-------------------|--------------------|----------------------------------|------------------------------------------------------------------|
| 1  | 9.182             | 979                | 817, 449, 287                    | cyanidin-3-sinapoyl-diglucoside-5-glucoside                      |
| 2  | 9.964             | 949                | 449, 287                         | cyanidin-3-feruloyl-diglucoside-5-glucoside                      |
| 3  | 14.72<br>0        | 1288               | 1126, 617,<br>449, 287           | unknown                                                          |
| 4  | 14.95<br>2        | 1141               | 979, 653, 449,<br>287            | cyanidin-3-sinapoyl-caffeoyl-diglucoside-5-glucoside I           |
| 5  | 15.88<br>1        | 1141               | 979, 653, 449,<br>287            | cyanidin-3-sinapoyl-caffeoyl-diglucoside-5-glucoside II          |
| 6  | 16.16<br>2        | 949                | 449, 287                         | cyanidin-3-caffeoyl-feruloyl-diglucoside                         |
| 7  | 16.81<br>6        | 1125               | 963, 449, 287                    | cyanidin-3-sinapoyl- <i>p</i> -coumaroyl-diglucoside-5-glucoside |
| 8  | 16.93<br>0        | 1111               | 930, 287                         | unknown                                                          |
| 9  | 17.09<br>0        | 1155               | 993, 449, 287                    | cyanidin-3 –feruloyl-sinapoyl -diglucoside-5-glucoside           |
| 10 | 17.35<br>9        | 1185               | 1023, 449, 287                   | cyanidin-3-disinapoyl-diglucoside-5-glucoside                    |

## Figure legends

### **Figure 1. Phenotypic characteristics and gene ontology (GO) categories enriched in the transcript profile of *Arabidopsis* wild type acclimated to long-term high light and elevated temperature.**

Two-week-old *Arabidopsis thaliana* wild type was shifted from growth light (130  $\mu\text{mol photons m}^{-2} \text{sec}^{-1}$  and 22°C) to high light and elevated temperature (HL+ET; 800  $\mu\text{mol photons m}^{-2} \text{sec}^{-1}$  and 28°C) for 2 weeks.

A) Phenotypic characteristics of *Arabidopsis thaliana* after long-term acclimation to high light and elevated temperature.

B) Gene Ontology (GO) categories enriched in the transcript profile of high light and elevated temperature-acclimated *Arabidopsis thaliana* wild type plants, when compared to plants grown under growth light and moderated temperature.

**Figure 2. Hierarchical clustering of gene expression profiles from long-term high light-and-elevated-temperature-acclimated plants and plants exposed to short-term high light shifts.** Purple denotes upregulation and green denotes downregulation of transcript abundance. The long-term high light acclimation dataset was obtained in this study (Table S1), while the others were downloaded from AtGenExpress and Gene Expression Omnibus (see Supplementary Tables S2 and S3 for full description of the datasets).

**Figure 3. Venn diagram depicting overlaps between the sets of differentially accumulated transcripts in long-term high light and elevated temperature and high light shift experiments according to the hierarchical clustering presented in Figure 2.**

**Figure 4. Visual characteristics of the kale varieties *Brassica oleracea* convar. *acephala* Half Tall and Black Magic.**

A) Morphological characteristics of Half Tall (HT) and Black Magic (BM) after 3 weeks of growth under 130  $\mu\text{mol photons m}^{-2}\text{s}^{-1}$  at 22°C (GL) or 800  $\mu\text{mol photons m}^{-2}\text{s}^{-1}$  at 26°C (HL+ ET). Scale bar corresponds to 2 cm.

B) Representative photographs depicting light- and temperature-dependent adjustments in leaf morphology and pigmentation as visualized from adaxial and abaxial surface of the first, second and third leaves. Scale bar corresponds to 2 cm.

**Figure 5. Photosynthetic performance of differentially light -acclimated kales.** Half Tall (HT) and Black Magic (BM) were grown for 3 weeks under 130  $\mu\text{mol photons m}^{-2}\text{s}^{-1}$  at 22°C (GL) or 800  $\mu\text{mol photons m}^{-2}\text{s}^{-1}$  at 26°C (HL+ET) and the photosynthetic parameters were measured with Dual-Pam.

A) **ETR (I)**, Electron transport rate.

B) **ETR (II)**, Electron transport rate.

C) **NPQ**, Non-photochemical quenching.

**Figure 6. Total content of carotenoids and anthocyanins in differentially light-acclimated Half Tall and Black Magic leaves.**

Half Tall (HT) and Black Magic (BM) were grown for 3 weeks under 130  $\mu\text{mol photons m}^{-2}\text{s}^{-1}$  at 22°C (GL) or 800  $\mu\text{mol photons m}^{-2}\text{s}^{-1}$  at 26°C (HL+ET) and the pigments were quantified by spectrophotometry. Error bars show the SE and different letters indicate statistically significant differences ( $p < 0.05$ ),  $n=4$ .

**Figure 7. Anthocyanin profiles in differentially light acclimated Black Magic kales.**

Black Magic (BM) was grown for 3 weeks under 130  $\mu\text{mol photons m}^{-2}\text{s}^{-1}$  at 22°C (GL) or 800  $\mu\text{mol photons m}^{-2}\text{s}^{-1}$  at 26°C (HL+ET) and the pigments were quantified by tandem UPLC with mass spectrometry. On the X-axis, the numbers correspond to detected peaks, which are depicted in Figure S3. Error bars indicate SE and \* indicate statistically significant differences ( $p < 0.05$ ) between light condition for each different compound,  $n=4$ . Tentative identities of the compounds are listed in Table 1.

**Figure 8. Contents of amino acids and SAM in differentially light-acclimated kales.**

Half Tall (HT) and Black Magic (BM) were grown under 130  $\mu\text{mol photons m}^{-2}\text{s}^{-1}$  at 22°C (GL) or 800  $\mu\text{mol photons m}^{-2}\text{s}^{-1}$  at 26°C (HL+ET) and the contents of amino acids and SAM were analysed LC-MS/MS. Quantitative values are expressed in  $\text{nmol mg}^{-1}$  FW. Error bars indicate SE and different letters indicate statistical significant differences ( $p < 0.05$ )  $n=8$ .

**Figure 9. SAHH abundance and complex formation in differentially light-acclimated kale leaves.**

A) SAHH abundance in Half Tall and Black Magic leaves as detected by SDS-PAGE and immunoblotting with specific anti-SAHH antibody.

B) SAHH-containing oligomeric complexes in Half Tall and Black Magic leaves as determined by CN-PAGE and subsequently immunoblotting with specific anti-SAHH antibody. GL, growth light; HL+ET, high light and elevated temperature.

**Figure 10. Contents of indole GSL in differentially light-acclimated kales.**

Half Tall (HT) and Black Magic (BM) were grown under  $130 \mu\text{mol photons m}^{-2}\text{s}^{-1}$  at  $22^\circ\text{C}$  (GL) or  $800 \mu\text{mol photons m}^{-2}\text{s}^{-1}$  at  $26^\circ\text{C}$  (HL+ET) and indole GSL were analysed by LC-MS/MS.

- A) Total amount of indole GSLs.
- B) Content of I3M (indol-3-ylmethyl GSL; glucobrassicin)
- C) Content of 4MO-I3M (4-methoxyindol-3-ylmethyl GSL; 4-methoxyglucobrassicin)
- D) Content of NMO-I3M (*N*-methoxyindol-3-ylmethyl GSL; neoglucobrassicin)

**Figure 11. Contents of aliphatic GSL in differentially high-light-acclimated kales.**

Half Tall and Black Magic were grown under  $130 \mu\text{mol photons m}^{-2}\text{s}^{-1}$  at  $22^\circ\text{C}$  (GL) or  $800 \mu\text{mol photons m}^{-2}\text{s}^{-1}$  at  $26^\circ\text{C}$  (HL+ET) and aliphatic GSL were analysed by LC-MS/MS.

- A) Total amount of aliphatic GSL
- B) Schematic representation of structural modifications occurring in the GSL structure
- C) Content of 3-carbon side chain GSLs. 3MTP (3-methylthiopropyl GSL), 3MSP (3-methylsulfinylpropyl GSL; glucoiberin) and 2PROP GSL (2-propenyl GSL; sinigrin)
- D) Content of 4-carbon side chain GSLs. 4MTB (4-methylthiolbutyl GSL; glucoerucin), 4MSB (4-methylsulfinylbutyl GSL; glucoraphanin), 3BUT (2(*R*)-2-hydroxy-3-butenyl GSL; Progoitrin).
- E) Content of 5-carbon side chain GSLs. 5MSP (5-methylsulfinylpentyl GSL; glucoalyssin)

**Figure 12. Content of the benzenic GSL 2-Phenylethyl (2PE) in differentially high-light-acclimated kales.**

Half Tall and Black Magic were grown under  $130 \mu\text{mol photons m}^{-2}\text{s}^{-1}$  at  $22^\circ\text{C}$  (GL) or  $800 \mu\text{mol photons m}^{-2}\text{s}^{-1}$  at  $26^\circ\text{C}$  (HL+ET) and benzenic GSLs were analysed by LC-MS/MS.

**Table 1. Anthocyanins content in Black Magic.**

No.: number of the peak in the obtained chromatograms (depicted in Figure S3);  $RT_{\min}$ : retention time in minutes;  $[M+H]^+$ : monoisotopic mass; Tentative ID: tentative identification.

Figure

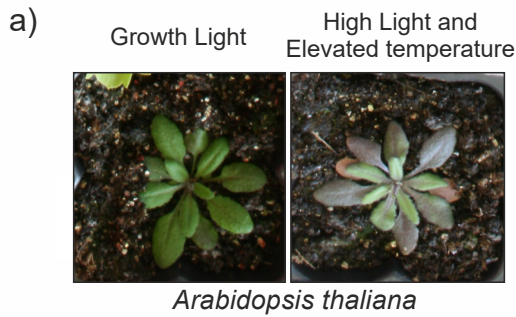

b)

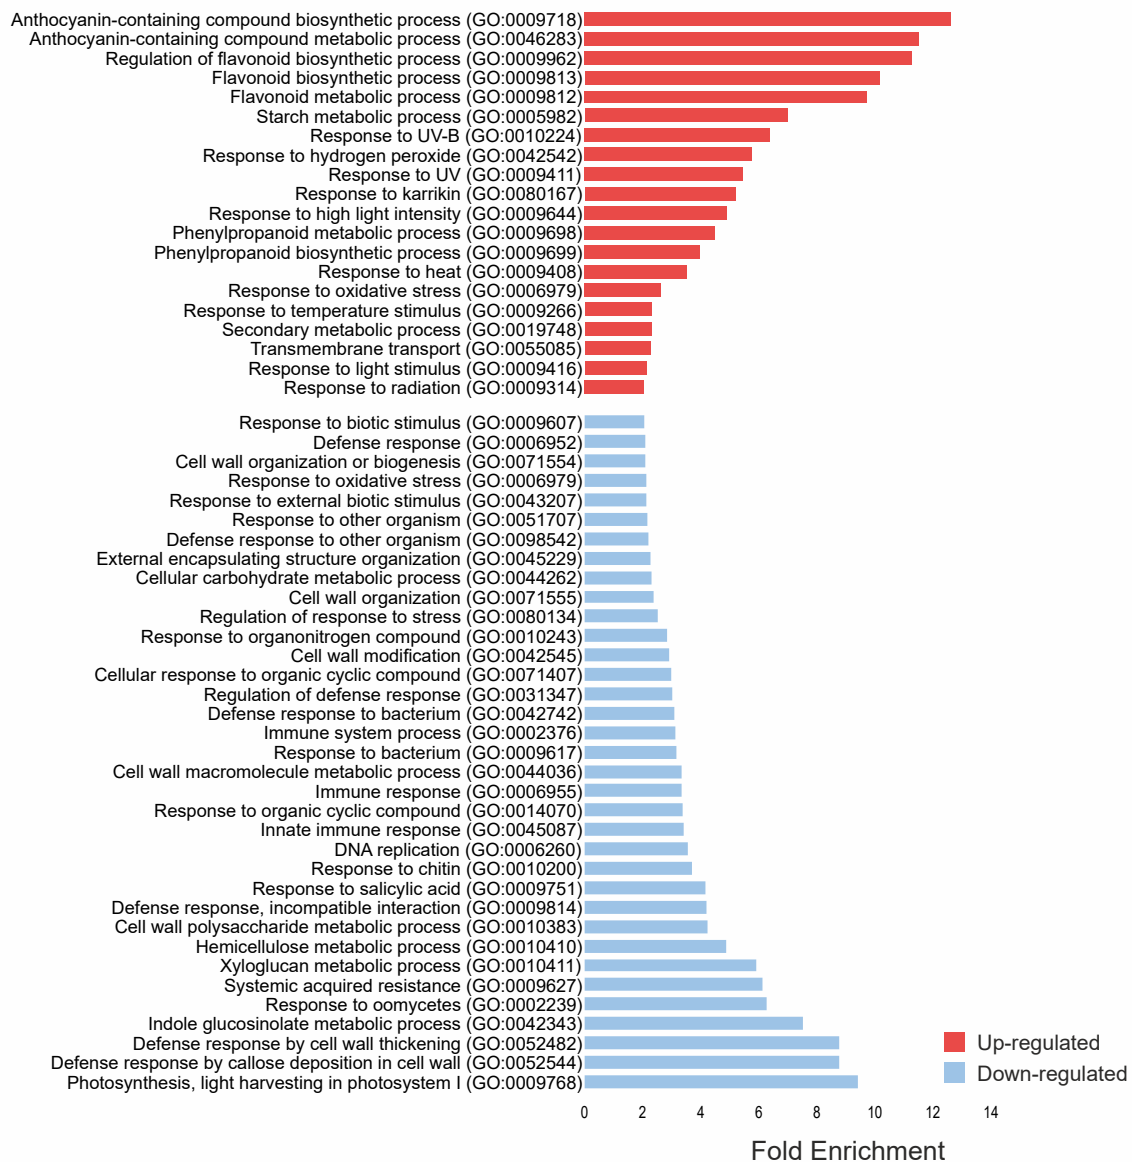



Figure 2

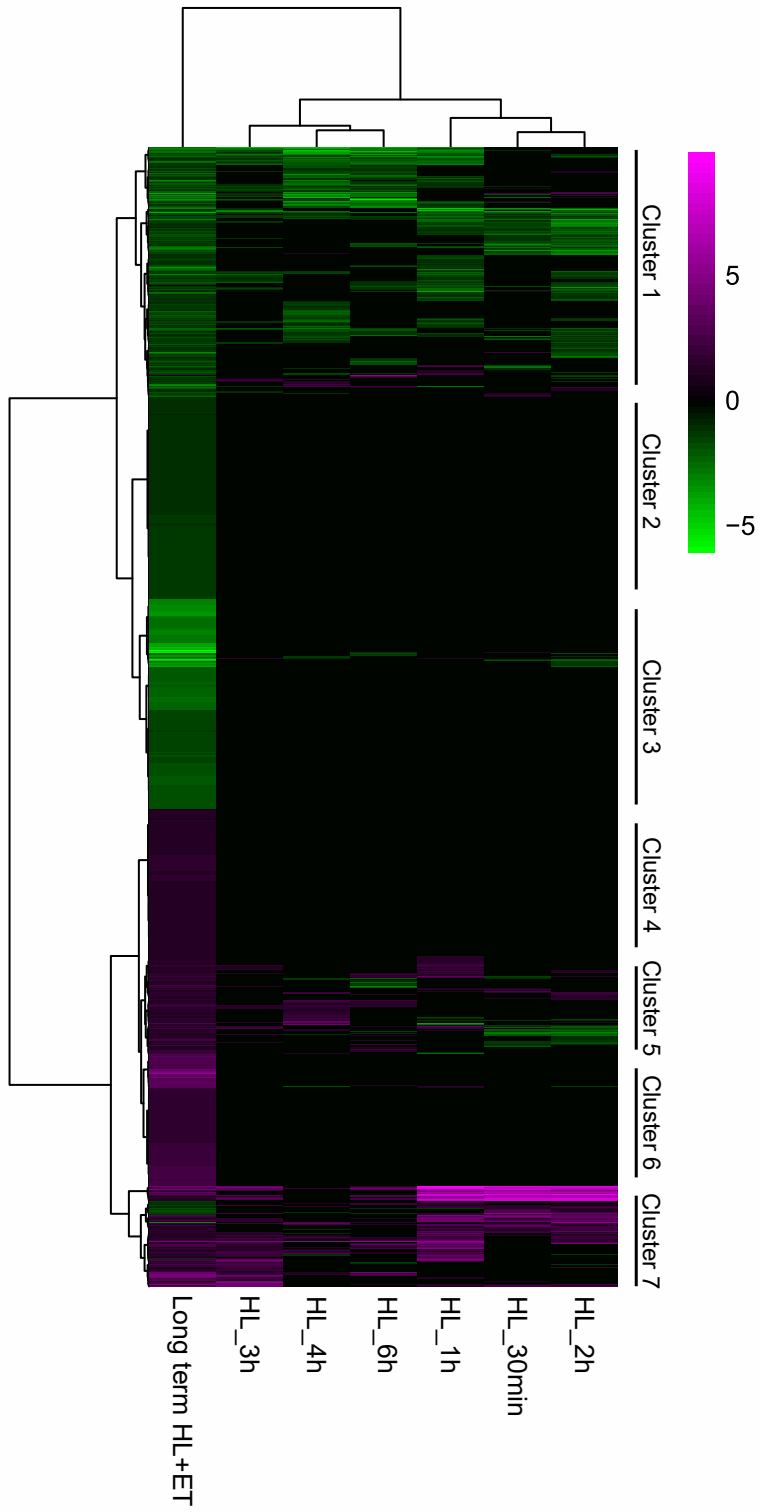

Figure 3

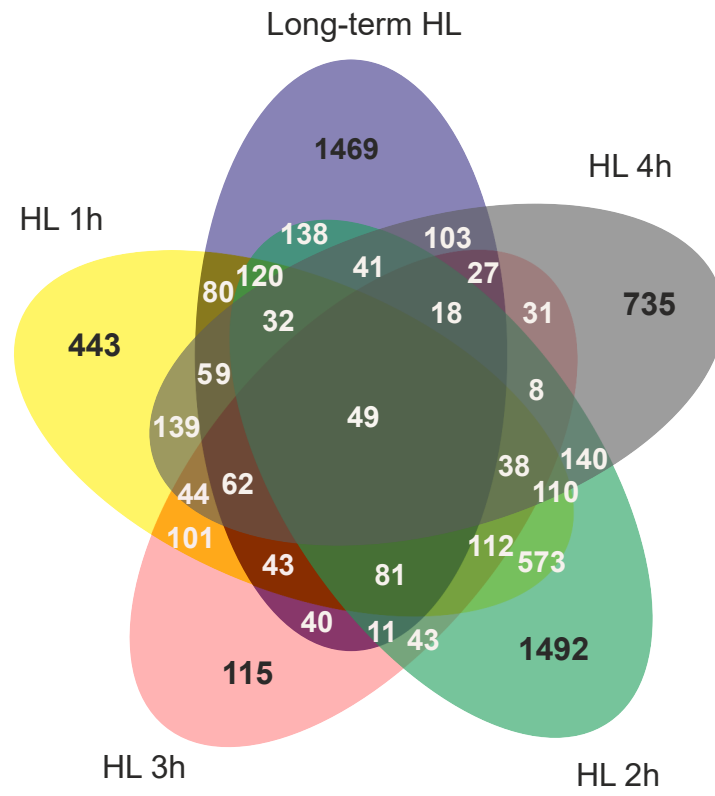

Figure 4

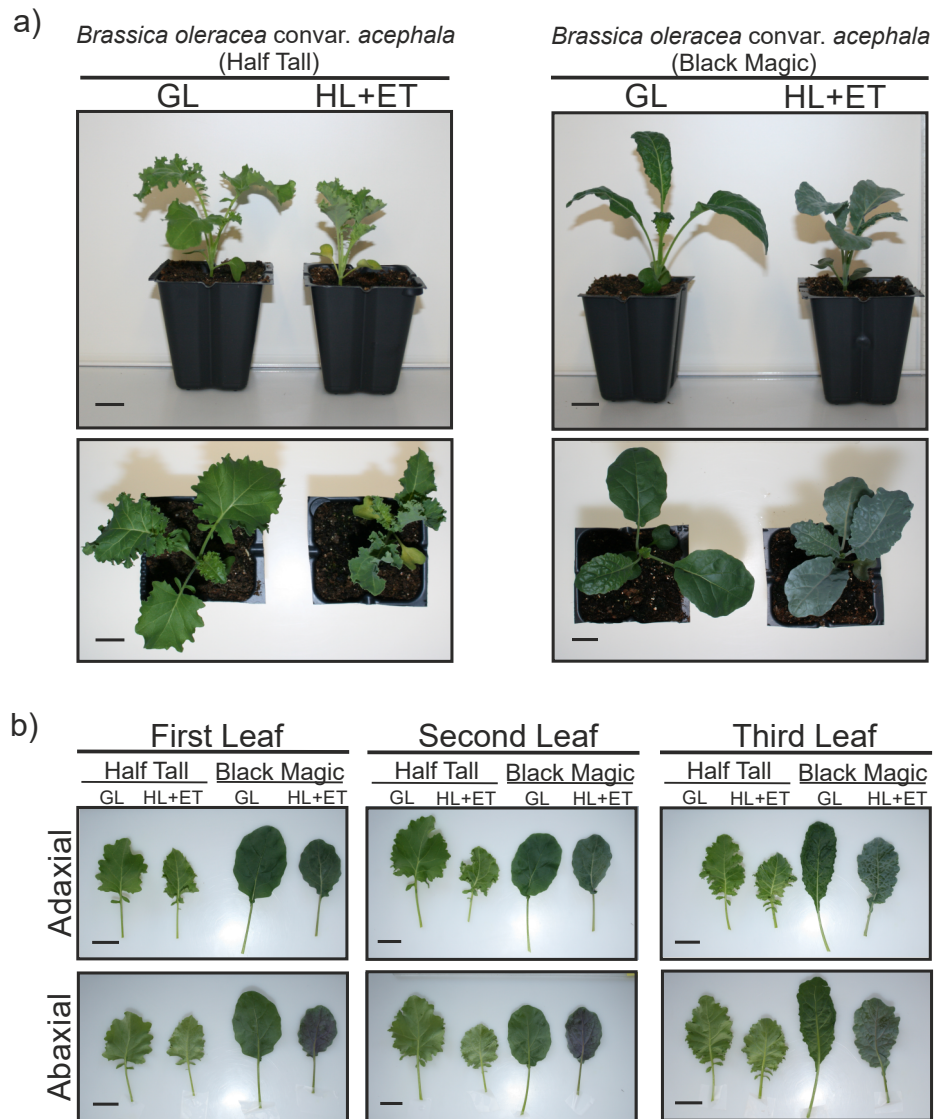

Figure 3

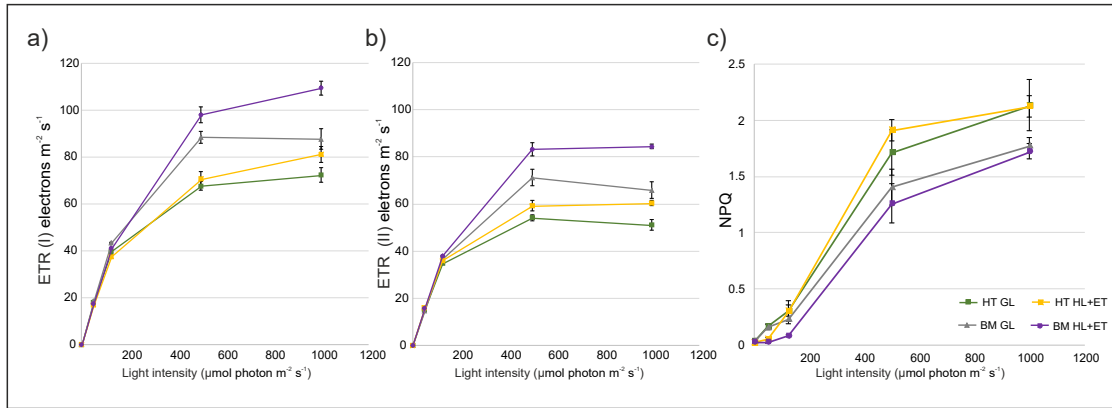

Figure 8

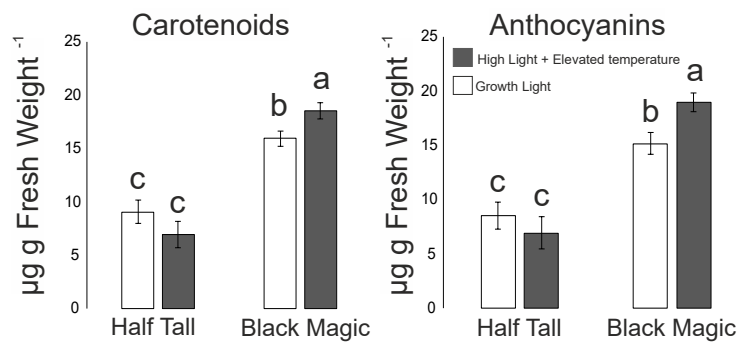

Figure 7

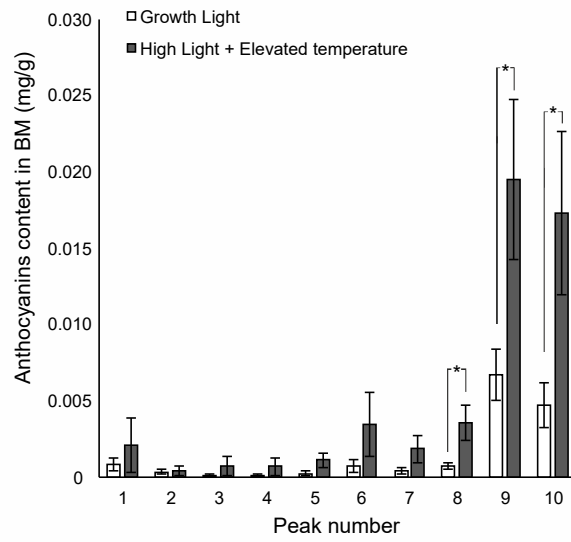

Figure 8

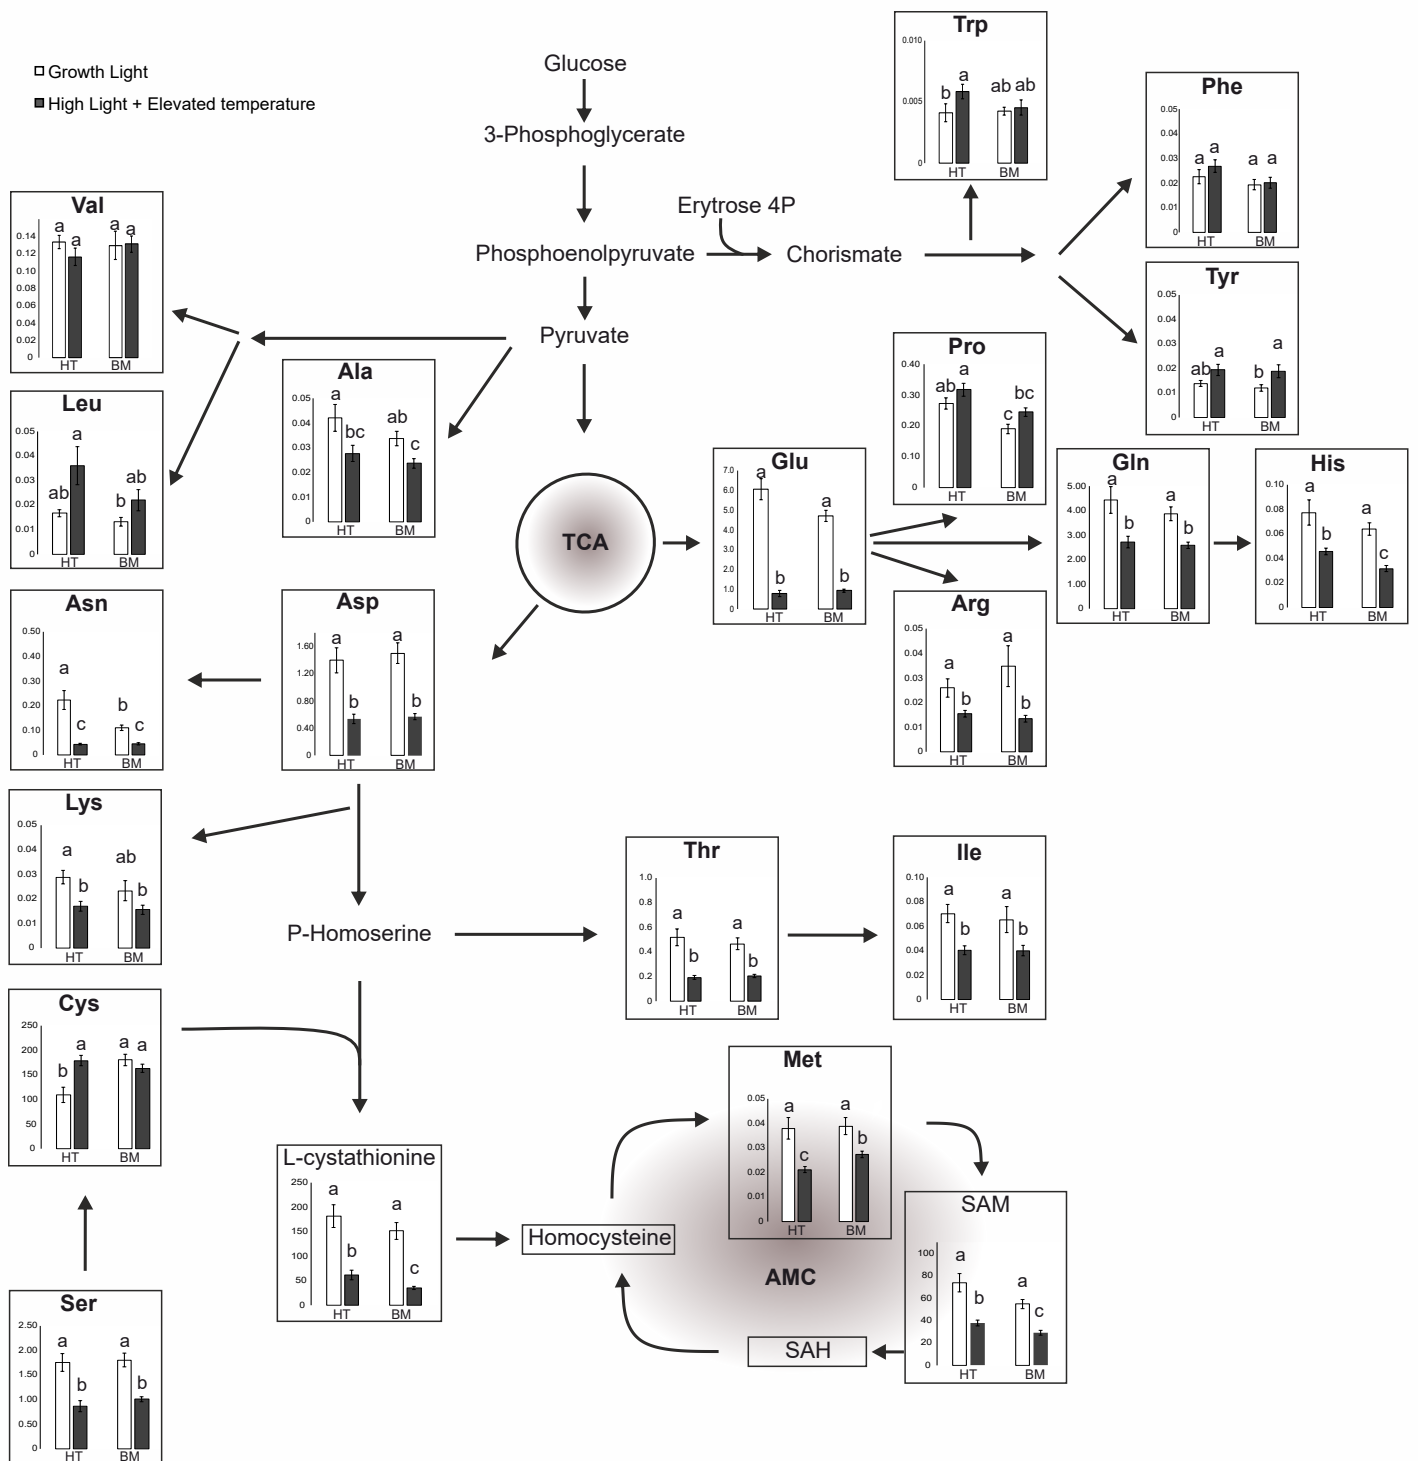

Figure 9

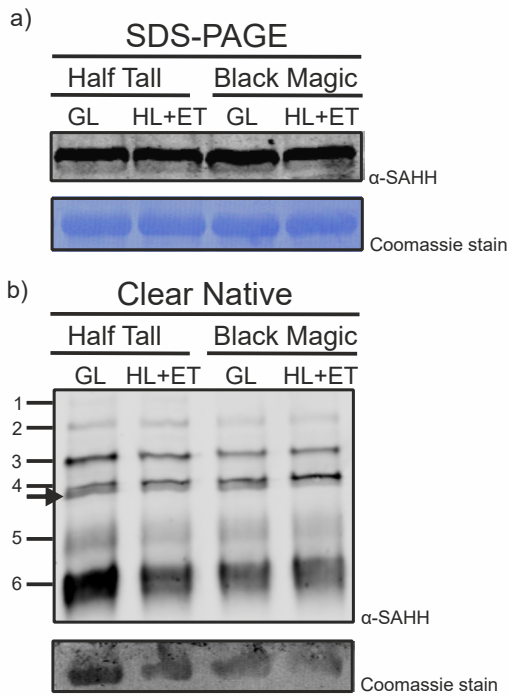



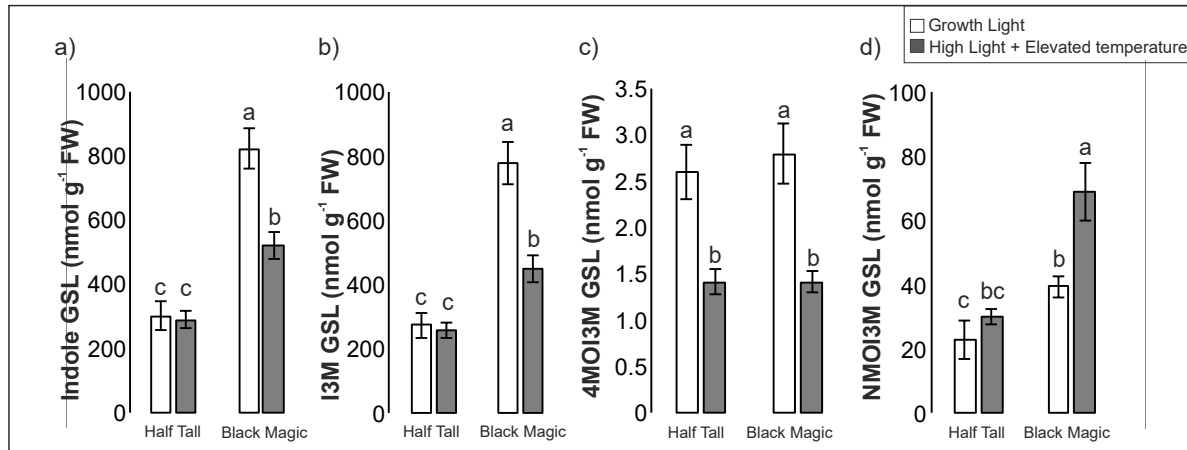

Figure 11

a)

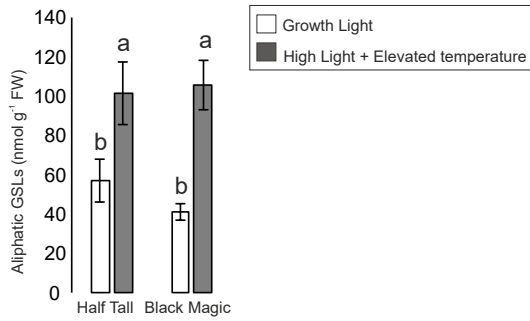

b)

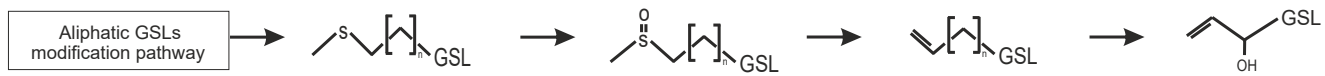

c)

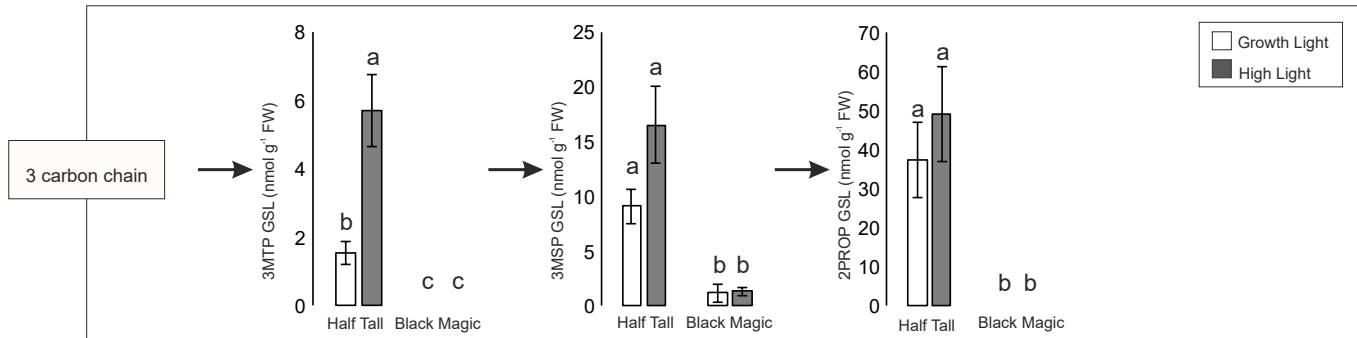

d)

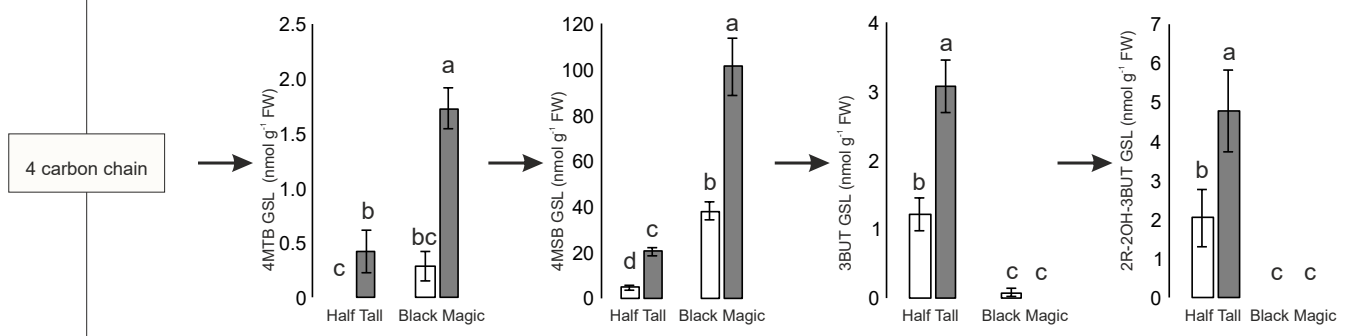

e)

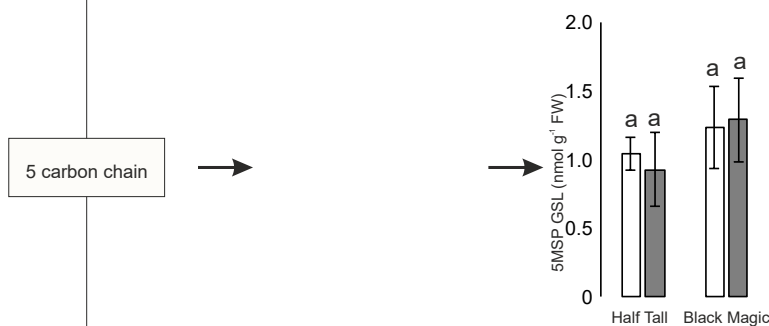

Figure 12

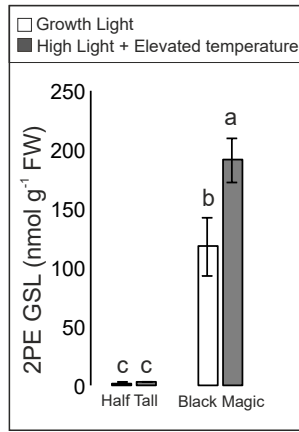

Source: https://www.biorxiv.org/content/10.1101/816405v1.full.pdf
